# Supplementary material for: Modeling the thermochemistry of nitrogen-containing compounds via group additivity
Source: Royal Society of Chemistry journal article supplement (doi:10.1039/d4cp00727a), 2024-01-01
Supplement: d4cp00727a1.pdf [file d4cp00727a1.pdf]

## Supporting Information

### **Modeling the thermochemistry of nitrogen-containing compounds via group additivity**

Cato A.R. Pappijn<sup>a</sup>, Ruben Van de Vijver<sup>a</sup>, Maarten K. Sabbe<sup>a</sup>, Marie-Françoise Reyniers<sup>a</sup>,  
Guy B. Marin<sup>a</sup>, Kevin M. Van Geem<sup>a</sup>

<sup>a</sup>Laboratory for Chemical Technology, Ghent University, Technologiepark 121, 9052 Gent, Belgium

\*Corresponding author: Technologiepark 121, 9052 Gent, Belgium, T: +32 92645597, e-mail: [kevin.vangeem@ugent.be](mailto:kevin.vangeem@ugent.be)

## Table of contents

|                                                                                   |    |
|-----------------------------------------------------------------------------------|----|
| 1. Experimental validation of CBS-QB3 methodology .....                           | 3  |
| 2. Database for regression of GAVs .....                                          | 4  |
| 3. Differences between CBS-QB3 and GA approximated thermodynamic properties ..... | 14 |
| 4. Comparison with previously derived GAVs.....                                   | 25 |
| References .....                                                                  | 28 |

# 1. Experimental validation of CBS-QB3 methodology

**Table S1: Training (T) and validation (V) reference data for regression of BACs: Experimental and *ab initio* calculated (with and without BACs) standard enthalpies of formation at 298 K and the corresponding deviations, expressed in kJ mol<sup>-1</sup>. The experimental database entries are taken from ATcT [1], Pedley et al. [2] and the NIST database [3].**

| No                                | InChI                                          | $S_{exp}^{\circ}$ | $S_{calc}^{\circ}$ | $S_{calc}^{\circ} - S_{exp}^{\circ}$ | $C_{p,exp}^{\circ}$ | $C_{p,calc}^{\circ}$ | $C_{p,calc}^{\circ} - C_{p,exp}^{\circ}$ |
|-----------------------------------|------------------------------------------------|-------------------|--------------------|--------------------------------------|---------------------|----------------------|------------------------------------------|
| 1                                 | InChI=1S/H3N/h1H3                              | 192.7             | 192.3              | -0.4                                 | 37.2                | 35.0                 | -2.2                                     |
| 2                                 | InChI=1S/CHN/c1-2/h1H                          | 201.8             | 201.1              | 0.8                                  | -                   | -                    | -                                        |
| 3                                 | InChI=1S/HNO/c1-2/h1H                          | 220.7             | 220.6              | 0.2                                  | -                   | -                    | -                                        |
| 4                                 | InChI=1S/H4N2/c1-2/h1-2H2                      | 238.7             | 239.4              | -0.7                                 | -                   | -                    | -                                        |
| 5                                 | InChI=1S/NO2/c2-1-3                            | 240.0             | 239.8              | 0.2                                  | -                   | -                    | -                                        |
| 6                                 | InChI=1S/C2N2/c3-1-2-4                         | 241.6             | 239.2              | 2.4                                  | -                   | -                    | -                                        |
| 7                                 | InChI=1S/CH5N/c1-2/h2H2,1H3                    | 242.9             | 241.5              | 1.4                                  | 50.1                | 49.5                 | -0.6                                     |
| 8                                 | InChI=1S/C2H3N/c1-2-3/h1H3                     | 243.4             | 242.4              | 1.0                                  | 52.5                | 51.8                 | -0.7                                     |
| 9                                 | InChI=1S/HNO2/c2-1-3/h(H,2,3)                  | 249.4             | 248.2              | 1.2                                  | 0.0                 | 0.0                  | 0.0                                      |
| 10                                | InChI=1S/C2H5N/c1-2-3-1/h3H,1-2H2              | 250.6             | 244.1              | 6.5                                  | 52.6                | 50.7                 | -1.9                                     |
| 11                                | InChI=1S/C2H7N/c1-3-2/h3H,1-2H3                | 273.0             | 273.0              | 0.0                                  | 70.7                | 69.6                 | -1.1                                     |
| 12                                | InChI=1S/CH3NO2/c1-2(3)4/h1H3                  | 275.0             | 275.3              | -0.3                                 | 57.3                | 57.2                 | -0.1                                     |
| 13                                | InChI=1S/C2H7N/c1-2-3/h2-3H2,1H3               | 283.8             | 281.8              | 2.0                                  | 71.5                | 71.8                 | 0.3                                      |
| 14                                | InChI=1S/CH3NO2/c1-4-2-3/h1H3                  | 284.3             | 286.5              | -2.2                                 | 63.2                | 64.3                 | 1.1                                      |
| 15                                | InChI=1S/C3H9N/c1-4(2)3/h1-3H3                 | 287.1             | 290.8              | -3.7                                 | -                   | -                    | -                                        |
| 16                                | InChI=1S/C3H9N/c1-3(2)4/h3H,4H2,1-2H3          | 312.2             | 311.9              | 0.3                                  | 97.5                | 95.5                 | -2.0                                     |
| 17                                | InChI=1S/C3H9N/c1-2-3-4/h2-4H2,1H3             | 325.1             | 322.5              | 2.6                                  | 91.2                | 95.3                 | 4.1                                      |
| 18                                | InChI=1S/C4H7N/c1-2-3-4-5/h2-3H2,1H3           | 325.4             | 323.5              | 1.9                                  | 97.0                | 96.6                 | -0.4                                     |
| 19                                | InChI=1S/C4H11N/c1-4(2,3)5/h5H2,1-3H3          | 337.9             | 329.0              | 8.9                                  | 120.0               | 121.8                | 1.8                                      |
| 20                                | InChI=1S/C4H11N/c1-3-4(2)5/h4H,3,5H2,1-2H3     | 351.3             | 355.0              | -3.7                                 | 117.2               | 121.3                | 4.1                                      |
| 21                                | InChI=1S/C4H11N/c1-3-5-4-2/h5H,3-4H2,1-2H3     | 352.2             | 346.1              | 6.1                                  | 115.7               | 123.5                | 7.8                                      |
| 22                                | InChI=1S/C4H11N/c1-2-3-4-5/h2-5H2,1H3          | 363.3             | 359.7              | 3.6                                  | 118.6               | 119.8                | 1.2                                      |
| 23                                | InChI=1S/C6H15N/c1-3-5-7-6-4-2/h7H,3-6H2,1-2H3 | -                 | -                  | 0.0                                  | 169.9               | 168.4                | 0.0                                      |
| Mean deviation (MD)               |                                                |                   |                    | 1.3                                  |                     |                      | 0.8                                      |
| Mean absolute deviation (MAD)     |                                                |                   |                    | 2.2                                  |                     |                      | 2.1                                      |
| Root mean squares deviation (RMS) |                                                |                   |                    | 3.2                                  |                     |                      | 2.8                                      |
| Maximum absolute deviation (MAX)  |                                                |                   |                    | 8.9                                  |                     |                      | 7.8                                      |

## 2. Database for regression of GAVs

Table S2: Training (T) and validation (V) data for regression of thermodynamic group additive values: Raw and BAC-corrected standard enthalpies of formation [kJ mol<sup>-1</sup>] calculated at the CBS-QB3 level of theory, molecular and intrinsic standard entropy at 298 K [J mol<sup>-1</sup> K<sup>-1</sup>], total symmetry number and number of optical isomers and heat capacity values [J mol<sup>-1</sup> K<sup>-1</sup>] at 300 K, 400 K, 500 K, 600 K, 800 K, 1000 K and 1500 K.

| No. |   | InChI                                 | $\Delta_f H^\circ$ | $\sigma$ | $n_{opt}$ | $S^\circ$ | $S_{int}^\circ$ | $C_p^\circ$ |       |       |       |       |        |        |
|-----|---|---------------------------------------|--------------------|----------|-----------|-----------|-----------------|-------------|-------|-------|-------|-------|--------|--------|
|     |   |                                       |                    |          |           |           |                 | 300 K       | 400 K | 500 K | 600 K | 800 K | 1000 K | 1500 K |
| 1   | T | InChI=1S/C2H2N/c1-2-3/h1,3H           | 397.7              | 1        | 1         | 255.1     | 255.1           | 58.7        | 65.5  | 70.7  | 74.9  | 81.3  | 86.3   | 94.6   |
| 2   | T | InChI=1S/C2H2N/c1-2-3/h1H2            | 262.2              | 2        | 1         | 248.0     | 253.8           | 52.5        | 59.8  | 65.8  | 70.7  | 78.6  | 84.6   | 94.2   |
| 3   | T | InChI=1S/C2H3N/c1-2-3/h1H,3H2         | 253.1              | 1        | 1         | 253.6     | 253.6           | 61.3        | 70.4  | 77.5  | 83.2  | 92.3  | 99.5   | 112.1  |
| 4   | T | InChI=1S/C2H3N/c1-2-3/h1H3            | 77.5               | 3        | 1         | 242.4     | 251.5           | 51.8        | 60.7  | 69.0  | 76.3  | 88.3  | 97.6   | 112.4  |
| 5   | T | InChI=1S/C2H3N/c1-2-3/h3H,1H2         | 190.5              | 1        | 1         | 249.9     | 249.9           | 55.0        | 65.5  | 74.1  | 81.1  | 91.9  | 100.0  | 113.2  |
| 6   | T | InChI=1S/C2H4N/c1-2-3/h1,3H2          | 290.8              | 1        | 1         | 276.7     | 276.7           | 66.7        | 79.0  | 88.8  | 96.4  | 107.8 | 116.3  | 130.6  |
| 7   | T | InChI=1S/C2H4N/c1-2-3/h1-2H,3H2       | 315.6              | 1        | 1         | 270.7     | 270.7           | 63.2        | 76.0  | 86.5  | 95.1  | 108.2 | 117.7  | 132.6  |
| 8   | T | InChI=1S/C2H4N/c1-2-3/h2-3H,1H2       | 210.7              | 1        | 1         | 259.8     | 259.8           | 56.5        | 70.2  | 81.9  | 91.4  | 106.0 | 116.6  | 133.4  |
| 9   | T | InChI=1S/C2H4N/c1-2-3/h2H,1H3         | 202.8              | 3        | 1         | 268.8     | 278.0           | 56.9        | 67.5  | 77.6  | 86.6  | 101.2 | 112.3  | 129.7  |
| 10  | T | InChI=1S/C2H4N/c1-2-3/h3H,1H3         | 227.5              | 3        | 1         | 268.6     | 277.7           | 56.6        | 67.5  | 77.7  | 86.6  | 100.9 | 111.7  | 129.0  |
| 11  | T | InChI=1S/C2H4N/c1-3-2/h1-2H2          | 233.6              | 8        | 1         | 245.2     | 262.4           | 59.1        | 71.9  | 83.1  | 92.4  | 106.8 | 117.5  | 134.2  |
| 12  | T | InChI=1S/C2H4N/c1-3-2/h1H,2H3         | 270.1              | 3        | 1         | 268.3     | 277.5           | 56.2        | 66.6  | 76.7  | 85.7  | 100.4 | 111.7  | 129.3  |
| 13  | T | InChI=1S/C2H5N/c1-2-3/h2-3H,1H3/b3-2+ | 45.7               | 3        | 1         | 263.4     | 272.6           | 58.7        | 71.6  | 84.0  | 95.1  | 113.0 | 126.6  | 148.1  |
| 14  | T | InChI=1S/C2H5N/c1-2-3/h2H,1,3H2       | 58.7               | 1        | 1         | 268.8     | 268.8           | 62.5        | 77.2  | 90.0  | 100.8 | 117.6 | 130.1  | 150.0  |
| 15  | T | InChI=1S/C2H5N/c1-3-2/h1H2,2H3        | 80.7               | 3        | 1         | 266.6     | 275.7           | 60.8        | 73.2  | 85.2  | 96.1  | 113.9 | 127.5  | 148.9  |
| 16  | T | InChI=1S/C2H5NO/c1-2(3)4/h1H3,3H2     | -236.9             | 3        | 1         | 296.2     | 305.4           | 73.9        | 89.7  | 103.7 | 115.6 | 134.3 | 148.2  | 170.4  |
| 17  | T | InChI=1S/C2H5NO/c1-2-3-4/h2H2,1H3     | 43.5               | 3        | 1         | 305.3     | 314.4           | 75.8        | 88.8  | 101.8 | 113.4 | 132.3 | 146.5  | 168.7  |
| 18  | T | InChI=1S/C2H5NO/c1-3-2-4/h2H,1H3,3H1  | -192.0             | 3        | 2         | 296.8     | 300.2           | 68.2        | 83.6  | 98.2  | 111.1 | 131.7 | 147.0  | 170.6  |
| 19  | T | InChI=1S/C2H5NO2/c1-2-5-3-4/h2H2,1H3  | -104.1             | 3        | 1         | 331.5     | 340.6           | 89.7        | 106.1 | 121.6 | 134.9 | 155.8 | 171.2  | 194.5  |
| 20  | T | InChI=1S/C2H6N/c1-2-3/h2H,3H2,1H3     | 122.0              | 3        | 1         | 286.6     | 295.8           | 72.1        | 86.8  | 100.0 | 111.5 | 129.8 | 143.8  | 166.4  |
| 21  | T | InChI=1S/C2H6N/c1-2-3/h3H,2H2,1H3     | 155.4              | 3        | 1         | 286.8     | 295.9           | 67.8        | 82.2  | 95.8  | 107.7 | 127.0 | 141.8  | 165.5  |
| 22  | T | InChI=1S/C2H6N/c1-3-2/h1-2H3          | 161.0              | 18       | 1         | 281.3     | 305.3           | 60.7        | 75.1  | 89.5  | 102.5 | 123.7 | 139.8  | 164.9  |
| 23  | T | InChI=1S/C2H6N/c1-3-2/h3H,1H2,2H3     | 156.3              | 6        | 2         | 285.2     | 294.3           | 72.1        | 86.4  | 99.4  | 110.8 | 129.3 | 143.6  | 166.8  |
| 24  | T | InChI=1S/C2H6N2/c1-2(3)4/h1,3-4H2     | 51.3               | 2        | 1         | 280.9     | 286.7           | 89.4        | 114.8 | 134.1 | 147.5 | 164.3 | 175.1  | 192.9  |

|    |   |                                                       |       |    |   |       |       |       |       |       |       |       |       |       |
|----|---|-------------------------------------------------------|-------|----|---|-------|-------|-------|-------|-------|-------|-------|-------|-------|
| 25 | T | InChI=1S/C2H6N2/c1-3-4-2/h1-2H3                       | 156.2 | 18 | 1 | 288.8 | 312.9 | 78.4  | 93.8  | 108.9 | 122.4 | 144.6 | 161.5 | 187.8 |
| 26 | T | InChI=1S/C2H6NO/c1-2-3-4/h3H,2H2,1H3                  | 16.8  | 3  | 2 | 320.4 | 323.8 | 79.0  | 95.7  | 111.4 | 124.9 | 146.5 | 162.7 | 188.2 |
| 27 | T | InChI=1S/C2H6NO/c1-2-3-4/h4H,2H2,1H3                  | 42.7  | 3  | 1 | 311.3 | 320.4 | 80.5  | 97.7  | 113.4 | 126.8 | 147.8 | 163.5 | 188.4 |
| 28 | T | InChI=1S/C2H6NO/c1-3(2)4/h1-2H3                       | 23.7  | 9  | 1 | 306.2 | 324.5 | 78.5  | 93.6  | 108.7 | 122.4 | 144.6 | 161.5 | 187.8 |
| 29 | T | InChI=1S/C2H7N/c1-2-3/h2-3H2,1H3                      | -45.3 | 3  | 1 | 281.8 | 290.9 | 71.8  | 88.6  | 104.2 | 117.7 | 139.6 | 156.4 | 183.7 |
| 30 | T | InChI=1S/C2H7N/c1-3-2/h3H,1-2H3                       | -14.8 | 9  | 1 | 273.0 | 291.3 | 69.6  | 86.7  | 102.9 | 117.0 | 139.7 | 157.0 | 184.7 |
| 31 | T | InChI=1S/C2H7NO/c1-2-3-4/h3-4H,2H2,1H3                | -78.8 | 3  | 1 | 306.7 | 315.9 | 86.7  | 108.2 | 127.5 | 143.6 | 167.6 | 184.4 | 209.5 |
| 32 | T | InChI=1S/C2H7NO/c1-3(2)4/h4H,1-2H3                    | -67.7 | 9  | 1 | 296.7 | 315.0 | 89.6  | 111.0 | 129.5 | 144.6 | 167.2 | 183.4 | 208.6 |
| 33 | T | InChI=1S/C2H8N2/c1-2(3)4/h2H,3-4H2,1H3                | -39.9 | 3  | 1 | 313.9 | 323.1 | 92.9  | 115.9 | 135.7 | 151.9 | 176.4 | 194.7 | 224.4 |
| 34 | T | InChI=1S/C2H8N2/c1-2-4-3/h4H,2-3H2,1H3                | 70.5  | 3  | 2 | 316.1 | 319.5 | 97.0  | 118.3 | 136.6 | 152.0 | 176.5 | 195.2 | 225.7 |
| 35 | T | InChI=1S/C2H8N2/c1-3-4-2/h3-4H,1-2H3                  | 97.6  | 18 | 4 | 307.6 | 320.1 | 91.6  | 113.9 | 133.9 | 150.7 | 177.0 | 196.4 | 226.8 |
| 36 | T | InChI=1S/C2H8N2/c1-4(2)3/h3H2,1-2H3                   | 84.2  | 9  | 1 | 302.8 | 321.0 | 90.6  | 113.8 | 134.4 | 151.4 | 177.5 | 196.8 | 227.0 |
| 37 | T | InChI=1S/C2H8N2/c1-4-2-3/h4H,2-3H2,1H3                | 4.1   | 3  | 2 | 325.3 | 328.6 | 95.3  | 114.5 | 132.5 | 148.2 | 173.5 | 192.8 | 223.9 |
| 38 | T | InChI=1S/C3H10N2/c1-2-3(4)5/h3H,2,4-5H2,1H3           | -58.0 | 3  | 1 | 351.6 | 360.8 | 117.7 | 145.8 | 170.6 | 191.3 | 223.1 | 246.5 | 284.2 |
| 39 | T | InChI=1S/C3H10N2/c1-3(2)5-4/h3,5H,4H2,1-2H3           | 37.3  | 9  | 2 | 343.5 | 356.0 | 124.0 | 151.3 | 174.8 | 194.5 | 225.3 | 248.6 | 286.1 |
| 40 | T | InChI=1S/C3H10N2/c1-3(4)5-2/h3,5H,4H2,1-2H3/t3-/m1/s1 | -33.0 | 9  | 2 | 348.4 | 360.9 | 118.9 | 146.2 | 170.6 | 191.2 | 223.0 | 246.8 | 284.8 |
| 41 | T | InChI=1S/C3H10N2/c1-3-5(2)4/h3-4H2,1-2H3              | 58.8  | 9  | 2 | 346.1 | 358.6 | 117.1 | 145.0 | 170.2 | 191.5 | 224.5 | 248.9 | 287.1 |
| 42 | T | InChI=1S/C3H10N2/c1-5(2)3-4/h3-4H2,1-2H3              | -4.3  | 9  | 1 | 341.6 | 359.8 | 115.0 | 143.1 | 168.7 | 190.4 | 223.9 | 248.5 | 286.7 |
| 43 | T | InChI=1S/C3H3N/c1-2-3-4/h1,3-4H/b4-3+                 | 334.7 | 1  | 1 | 275.5 | 275.5 | 66.4  | 79.1  | 89.5  | 98.0  | 111.1 | 120.7 | 135.9 |
| 44 | T | InChI=1S/C3H4N/c1-2-3-4/h2-3H,1H2                     | 306.2 | 1  | 1 | 284.0 | 284.0 | 72.6  | 89.8  | 103.4 | 113.9 | 129.0 | 139.6 | 155.8 |
| 45 | T | InChI=1S/C3H4N/c1-2-3-4/h2H,1H3                       | 228.1 | 3  | 1 | 294.2 | 303.3 | 68.6  | 82.0  | 94.0  | 104.4 | 120.9 | 133.2 | 152.4 |
| 46 | T | InChI=1S/C3H4N/c1-2-3-4/h4H,1H3                       | 357.7 | 3  | 1 | 305.6 | 314.7 | 77.7  | 90.0  | 101.1 | 110.8 | 126.4 | 138.2 | 156.7 |
| 47 | T | InChI=1S/C3H4N/c1-3-4-2/h1H,2H3                       | 392.8 | 3  | 1 | 297.4 | 306.5 | 73.6  | 86.5  | 97.8  | 107.6 | 123.0 | 134.6 | 152.9 |
| 48 | T | InChI=1S/C3H5N/c1-2-3-4/h2,4H,1H3                     | 171.6 | 3  | 1 | 288.4 | 297.5 | 76.0  | 90.9  | 104.5 | 116.2 | 135.0 | 149.2 | 171.6 |
| 49 | T | InChI=1S/C3H5N/c1-2-3-4/h2-4H,1H2/b4-3-               | 145.5 | 1  | 1 | 278.0 | 278.0 | 72.5  | 92.2  | 108.8 | 122.2 | 141.7 | 155.3 | 175.6 |
| 50 | T | InChI=1S/C3H5N/c1-2-3-4/h2H2,1H3                      | 60.8  | 3  | 1 | 285.2 | 294.4 | 72.9  | 88.6  | 102.5 | 114.5 | 133.8 | 148.5 | 171.5 |
| 51 | T | InChI=1S/C3H5N/c1-2-3-4/h4H2,1H3                      | 219.2 | 1  | 1 | 308.9 | 308.9 | 82.0  | 96.0  | 108.7 | 119.8 | 137.8 | 151.7 | 174.3 |
| 52 | T | InChI=1S/C3H5N/c1-3-4-2/h1,4H,2H3                     | 262.0 | 3  | 2 | 297.7 | 301.1 | 80.1  | 94.4  | 107.0 | 117.8 | 135.4 | 148.9 | 170.9 |
| 53 | T | InChI=1S/C3H5N/c1-3-4-2/h1H2,2H3                      | 191.0 | 3  | 1 | 289.5 | 298.6 | 74.7  | 89.8  | 103.6 | 115.4 | 134.5 | 148.9 | 171.6 |
| 54 | T | InChI=1S/C3H5N/c1-3-4-2/h3H,1-2H2                     | 171.3 | 1  | 1 | 288.2 | 288.2 | 79.4  | 97.3  | 111.8 | 123.3 | 140.7 | 153.6 | 174.1 |
| 55 | T | InChI=1S/C3H6N/c1-2-3-4/h2,4H,1,3H2                   | 269.2 | 1  | 1 | 314.5 | 314.5 | 80.5  | 98.4  | 114.4 | 127.8 | 148.8 | 164.5 | 189.2 |
| 56 | T | InChI=1S/C3H6N/c1-2-3-4/h2-3H,1,4H2                   | 171.9 | 2  | 1 | 294.8 | 300.6 | 82.9  | 102.4 | 118.9 | 132.5 | 153.3 | 168.6 | 193.1 |

|    |   |                                             |        |    |   |       |       |       |       |       |       |       |       |       |
|----|---|---------------------------------------------|--------|----|---|-------|-------|-------|-------|-------|-------|-------|-------|-------|
| 57 | T | InChI=1S/C3H6N/c1-2-3-4/h2-4H,1H3           | 178.3  | 3  | 1 | 298.0 | 307.1 | 76.7  | 95.0  | 111.9 | 126.3 | 149.0 | 165.8 | 191.9 |
| 58 | T | InChI=1S/C3H6N/c1-2-3-4/h3-4H,1-2H2/b4-3+   | 238.4  | 2  | 1 | 316.0 | 321.8 | 84.9  | 100.4 | 115.1 | 127.9 | 148.4 | 164.0 | 188.8 |
| 59 | T | InChI=1S/C3H6N/c1-2-3-4/h4H,2H2,1H3         | 209.4  | 3  | 1 | 314.2 | 323.4 | 79.1  | 95.7  | 111.2 | 124.6 | 146.0 | 162.2 | 187.9 |
| 60 | T | InChI=1S/C3H6N/c1-3(2)4/h1-2H3              | 163.5  | 18 | 1 | 299.1 | 323.1 | 80.2  | 95.7  | 110.6 | 123.9 | 145.5 | 162.0 | 188.0 |
| 61 | T | InChI=1S/C3H6N/c1-3(2)4/h4H,1H2,2H3         | 174.2  | 6  | 1 | 299.1 | 314.0 | 77.8  | 97.4  | 114.5 | 128.8 | 150.9 | 167.3 | 192.4 |
| 62 | T | InChI=1S/C3H6N/c1-3-4-2/h1,3-4H,2H3         | 317.5  | 3  | 2 | 311.3 | 314.7 | 87.7  | 104.8 | 120.1 | 133.2 | 153.8 | 169.0 | 192.3 |
| 63 | T | InChI=1S/C3H6N/c1-3-4-2/h2H,3H2,1H3         | 244.7  | 3  | 1 | 312.7 | 321.8 | 80.7  | 97.1  | 112.5 | 125.8 | 147.2 | 163.4 | 188.9 |
| 64 | T | InChI=1S/C3H6N/c1-3-4-2/h3-4H,1-2H2         | 229.4  | 2  | 1 | 306.9 | 312.7 | 86.3  | 104.2 | 119.7 | 132.7 | 153.1 | 168.4 | 192.4 |
| 65 | T | InChI=1S/C3H6N/c1-3-4-2/h3H,1H2,2H3         | 199.3  | 3  | 1 | 295.9 | 305.0 | 78.0  | 96.2  | 112.9 | 127.3 | 149.8 | 166.5 | 192.5 |
| 66 | T | InChI=1S/C3H6N/c1-3-4-2/h3H,2H2,1H3         | 192.4  | 6  | 1 | 294.4 | 309.3 | 79.1  | 97.2  | 113.8 | 127.9 | 150.3 | 166.9 | 192.8 |
| 67 | T | InChI=1S/C3H6N/c1-3-4-2/h4H,1H2,2H3         | 295.2  | 3  | 2 | 318.3 | 321.7 | 79.9  | 96.6  | 112.0 | 125.3 | 146.5 | 162.4 | 187.8 |
| 68 | T | InChI=1S/C3H7N/c1-2-3-4/h2-3H,4H2,1H3/b3-2+ | 36.8   | 3  | 1 | 302.8 | 312.0 | 86.8  | 106.3 | 124.0 | 139.2 | 163.0 | 180.7 | 208.7 |
| 69 | T | InChI=1S/C3H7N/c1-2-3-4/h2H,1,3-4H2         | 65.0   | 1  | 1 | 304.4 | 304.4 | 88.5  | 109.6 | 127.0 | 141.3 | 163.5 | 180.3 | 207.9 |
| 70 | T | InChI=1S/C3H7N/c1-2-3-4/h3-4H,2H2,1H3/b4-3+ | 27.5   | 3  | 1 | 307.3 | 316.4 | 80.1  | 99.5  | 117.6 | 133.4 | 158.5 | 177.5 | 207.3 |
| 71 | T | InChI=1S/C3H7N/c1-3(2)4/h1,4H2,2H3          | 21.9   | 3  | 1 | 298.7 | 307.9 | 86.4  | 107.3 | 125.4 | 140.6 | 164.5 | 182.3 | 210.1 |
| 72 | T | InChI=1S/C3H7N/c1-3(2)4/h4H,1-2H3           | 4.9    | 9  | 1 | 299.6 | 317.8 | 80.6  | 99.1  | 116.7 | 132.2 | 157.4 | 176.4 | 206.6 |
| 73 | T | InChI=1S/C3H7N/c1-3-4-2/h2-3H2,1H3          | 55.9   | 3  | 1 | 298.6 | 307.7 | 84.6  | 104.1 | 121.7 | 137.0 | 161.3 | 179.8 | 208.8 |
| 74 | T | InChI=1S/C3H7N/c1-3-4-2/h3-4H,1H2,2H3       | 61.4   | 3  | 2 | 298.6 | 301.9 | 83.6  | 103.6 | 121.7 | 137.3 | 162.0 | 180.6 | 210.4 |
| 75 | T | InChI=1S/C3H7N/c1-3-4-2/h3H,1-2H3/b4-3+     | 38.3   | 9  | 1 | 297.5 | 315.8 | 82.1  | 99.8  | 117.1 | 132.6 | 158.0 | 177.3 | 207.5 |
| 76 | T | InChI=1S/C3H7NO/c1-2-3(4)5/h2H2,1H3,4H2     | -256.1 | 3  | 1 | 336.6 | 345.8 | 99.2  | 119.5 | 138.1 | 154.1 | 179.7 | 198.9 | 229.5 |
| 77 | T | InChI=1S/C3H7NO/c1-2-3-4-5/h2-3H2,1H3       | 25.5   | 3  | 1 | 342.4 | 351.5 | 96.2  | 117.0 | 136.1 | 152.6 | 178.8 | 198.2 | 228.5 |
| 78 | T | InChI=1S/C3H7NO/c1-3(2)4-5/h3H,1-2H3        | 11.2   | 3  | 1 | 333.2 | 342.3 | 98.5  | 118.1 | 136.3 | 152.2 | 177.9 | 197.3 | 227.7 |
| 79 | T | InChI=1S/C3H7NO/c1-3(5)4-2/h1-2H3,4H1       | -237.2 | 9  | 2 | 327.2 | 339.7 | 89.2  | 110.7 | 130.8 | 148.3 | 176.1 | 196.7 | 228.9 |
| 80 | T | InChI=1S/C3H7NO/c1-4(2)3-5/h3H,1-2H3        | -196.9 | 9  | 1 | 324.4 | 342.6 | 93.4  | 112.6 | 131.6 | 148.7 | 176.7 | 197.7 | 230.2 |
| 81 | T | InChI=1S/C3H7NO2/c1-2-3-4(5)6/h2-3H2,1H3    | -132.6 | 6  | 1 | 354.9 | 369.8 | 103.2 | 128.0 | 150.2 | 169.0 | 198.0 | 219.1 | 251.3 |
| 82 | T | InChI=1S/C3H7NO2/c1-2-3-6-4-5/h2-3H2,1H3    | -122.9 | 3  | 1 | 359.1 | 368.2 | 108.9 | 132.9 | 154.6 | 172.9 | 201.5 | 222.3 | 254.0 |
| 83 | T | InChI=1S/C3H7NO2/c1-3(2)4(5)6/h3H,1-2H3     | -147.2 | 18 | 1 | 346.8 | 370.8 | 104.9 | 129.4 | 151.2 | 169.6 | 198.1 | 219.0 | 250.9 |
| 84 | T | InChI=1S/C3H7NO2/c1-3(2)6-4-5/h3H,1-2H3     | -139.4 | 9  | 1 | 348.4 | 366.6 | 116.5 | 141.2 | 161.7 | 178.4 | 204.3 | 223.4 | 253.3 |
| 85 | T | InChI=1S/C3H8N/c1-2-3-4/h1-4H2              | 143.1  | 2  | 1 | 335.0 | 340.7 | 93.0  | 114.2 | 133.1 | 149.2 | 174.4 | 193.5 | 224.4 |
| 86 | T | InChI=1S/C3H8N/c1-2-3-4/h2H,3-4H2,1H3       | 133.1  | 3  | 1 | 334.5 | 343.6 | 92.0  | 111.7 | 130.1 | 146.2 | 172.0 | 191.8 | 223.7 |
| 87 | T | InChI=1S/C3H8N/c1-2-3-4/h3H,2,4H2,1H3       | 104.5  | 3  | 1 | 325.9 | 335.0 | 93.4  | 114.7 | 133.5 | 149.6 | 174.9 | 194.2 | 225.1 |
| 88 | T | InChI=1S/C3H8N/c1-2-3-4/h4H,2-3H2,1H3       | 140.5  | 3  | 1 | 327.2 | 336.3 | 90.6  | 111.1 | 130.2 | 146.8 | 173.3 | 193.3 | 225.0 |

|     |   |                                                           |        |    |   |       |       |       |       |       |       |       |       |       |
|-----|---|-----------------------------------------------------------|--------|----|---|-------|-------|-------|-------|-------|-------|-------|-------|-------|
| 89  | T | InChI=1S/C3H8N/c1-3(2)4/h3-4H,1-2H3                       | 125.2  | 9  | 1 | 318.5 | 336.7 | 91.6  | 112.9 | 131.9 | 148.1 | 173.9 | 193.5 | 224.9 |
| 90  | T | InChI=1S/C3H8N/c1-3(2)4/h4H2,1-2H3                        | 77.5   | 18 | 1 | 316.6 | 340.6 | 97.0  | 115.8 | 133.2 | 148.5 | 173.6 | 193.0 | 224.5 |
| 91  | T | InChI=1S/C3H8N/c1-3-4-2/h3H2,1-2H3                        | 134.9  | 9  | 2 | 323.0 | 335.5 | 88.1  | 107.8 | 126.9 | 143.8 | 171.2 | 192.0 | 224.7 |
| 92  | T | InChI=1S/C3H8N/c1-3-4-2/h4H,1,3H2,2H3                     | 169.4  | 6  | 2 | 325.6 | 334.7 | 98.3  | 117.5 | 135.4 | 150.9 | 176.0 | 195.2 | 226.0 |
| 93  | T | InChI=1S/C3H8N/c1-3-4-2/h4H,2-3H2,1H3                     | 131.8  | 9  | 2 | 324.4 | 336.9 | 96.8  | 116.8 | 134.9 | 150.4 | 175.5 | 194.8 | 225.8 |
| 94  | T | InChI=1S/C3H8N2/c1-2-3(4)5/h2-3H,1,4-5H2                  | 74.2   | 1  | 1 | 338.3 | 338.3 | 111.1 | 136.7 | 157.5 | 174.0 | 198.7 | 217.2 | 247.6 |
| 95  | T | InChI=1S/C3H8N2/c1-3(4)5-2/h5H,1,4H2,2H3                  | 54.6   | 3  | 2 | 322.4 | 325.7 | 108.3 | 138.9 | 164.6 | 184.4 | 211.3 | 228.6 | 254.4 |
| 96  | T | InChI=1S/C3H8N2/c1-3-5-4-2/h3H2,1-2H3                     | 131.1  | 9  | 1 | 334.6 | 352.9 | 101.1 | 122.7 | 143.1 | 161.2 | 190.4 | 212.4 | 247.0 |
| 97  | T | InChI=1S/C3H8NO/c1-3(2)4-5/h3,5H,1-2H3                    | 11.9   | 9  | 1 | 341.0 | 359.2 | 107.4 | 130.8 | 151.3 | 168.5 | 195.5 | 215.8 | 248.0 |
| 98  | T | InChI=1S/C3H8NO/c1-3(2)4-5/h3-4H,1-2H3                    | -16.3  | 9  | 2 | 349.8 | 362.3 | 103.9 | 126.4 | 146.9 | 164.6 | 192.8 | 214.1 | 247.5 |
| 99  | T | InChI=1S/C3H8NO/c1-3-4(2)5/h3H2,1-2H3                     | -3.1   | 9  | 2 | 350.3 | 362.8 | 102.0 | 123.1 | 143.5 | 161.6 | 190.8 | 212.8 | 247.2 |
| 100 | T | InChI=1S/C3H9N/c1-2-3-4/h2-4H2,1H3                        | -63.3  | 3  | 1 | 322.5 | 331.7 | 95.3  | 117.9 | 138.8 | 156.8 | 185.8 | 207.8 | 243.2 |
| 101 | T | InChI=1S/C3H9N/c1-3(2)4/h3H,4H2,1-2H3                     | -80.7  | 9  | 1 | 311.9 | 330.2 | 95.5  | 119.5 | 140.8 | 158.7 | 187.1 | 208.7 | 243.6 |
| 102 | T | InChI=1S/C3H9N/c1-3-4-2/h4H,3H2,1-2H3                     | -40.7  | 9  | 2 | 315.0 | 327.5 | 96.4  | 118.4 | 139.0 | 157.1 | 186.5 | 208.9 | 244.5 |
| 103 | T | InChI=1S/C3H9N/c1-4(2)3/h1-3H3                            | -24.3  | 81 | 1 | 290.8 | 327.3 | 91.3  | 115.5 | 138.2 | 157.7 | 188.4 | 211.1 | 246.4 |
| 104 | T | InChI=1S/C3H9NO/c1-3(2)4-5/h3-5H,1-2H3                    | -112.2 | 9  | 1 | 334.3 | 352.6 | 112.7 | 140.0 | 164.5 | 184.8 | 215.4 | 236.9 | 269.5 |
| 105 | T | InChI=1S/C3H9NO/c1-3-4(2)5/h5H,3H2,1-2H3                  | -94.6  | 9  | 2 | 336.5 | 349.0 | 118.0 | 144.9 | 168.0 | 186.9 | 215.8 | 236.8 | 269.3 |
| 106 | T | InChI=1S/C4H10N/c1-2-3-4-5/h2H,3-5H2,1H3                  | 112.8  | 3  | 1 | 374.6 | 383.8 | 113.1 | 139.3 | 163.7 | 184.7 | 218.1 | 243.3 | 283.3 |
| 107 | T | InChI=1S/C4H10N/c1-2-3-4-5/h3H,2,4-5H2,1H3                | 116.0  | 3  | 1 | 377.9 | 387.0 | 110.9 | 138.1 | 162.7 | 183.7 | 217.0 | 242.2 | 282.5 |
| 108 | T | InChI=1S/C4H10N/c1-2-3-4-5/h4H,2-3,5H2,1H3                | 86.1   | 3  | 1 | 364.5 | 373.6 | 118.0 | 145.0 | 169.1 | 189.7 | 222.1 | 246.6 | 285.4 |
| 109 | T | InChI=1S/C4H10N/c1-3-4(2)5/h3,5H2,1-2H3                   | 61.4   | 9  | 1 | 364.1 | 382.3 | 115.9 | 142.1 | 165.8 | 186.3 | 219.1 | 244.0 | 283.7 |
| 110 | T | InChI=1S/C4H10N/c1-3-5-4-2/h3,5H,4H2,1-2H3                | 99.1   | 9  | 2 | 363.9 | 376.4 | 125.4 | 147.9 | 169.9 | 189.5 | 221.6 | 246.1 | 285.3 |
| 111 | T | InChI=1S/C4H10N/c1-3-5-4-2/h3-4H2,1-2H3                   | 108.8  | 18 | 1 | 355.2 | 379.2 | 114.7 | 140.4 | 164.4 | 185.3 | 219.0 | 244.6 | 284.8 |
| 112 | T | InChI=1S/C4H10N/c1-3-5-4-2/h5H,1,3-4H2,2H3                | 143.3  | 6  | 2 | 364.2 | 373.4 | 124.6 | 148.5 | 170.9 | 190.6 | 222.6 | 246.9 | 285.8 |
| 113 | T | InChI=1S/C4H10N/c1-4(2)3-5/h4-5H,3H2,1-2H3                | 108.2  | 9  | 1 | 352.0 | 370.3 | 117.5 | 144.3 | 168.7 | 189.4 | 222.1 | 246.7 | 285.6 |
| 114 | T | InChI=1S/C4H10N2/c1-3-4(5)6-2/h3-4,6H,1,5H2,2H3/t4-/m1/s1 | 75.5   | 3  | 2 | 364.6 | 368.0 | 138.0 | 174.5 | 203.6 | 225.4 | 255.6 | 277.0 | 311.6 |
| 115 | T | InChI=1S/C4H10N2/c1-3-5-6-4-2/h3-4H2,1-2H3                | 105.7  | 18 | 1 | 372.5 | 396.5 | 124.0 | 151.7 | 177.4 | 199.9 | 236.1 | 263.4 | 306.1 |
| 116 | T | InChI=1S/C4H11N/c1-2-3-4-5/h2-5H2,1H3                     | -81.3  | 3  | 1 | 359.8 | 368.9 | 119.8 | 147.4 | 173.3 | 195.8 | 231.9 | 259.3 | 302.9 |
| 117 | T | InChI=1S/C4H11N/c1-3-4(2)5/h4H,3,5H2,1-2H3/t4-/m1/s1      | -95.7  | 9  | 2 | 355.0 | 367.5 | 121.3 | 150.2 | 176.3 | 198.5 | 233.8 | 260.5 | 303.4 |
| 118 | T | InChI=1S/C4H11N/c1-3-5-4-2/h5H,3-4H2,1-2H3                | -63.2  | 9  | 1 | 346.1 | 364.4 | 123.5 | 150.3 | 175.5 | 197.6 | 233.5 | 261.0 | 304.4 |
| 119 | T | InChI=1S/C4H11N/c1-4(2)3-5/h4H,3,5H2,1-2H3                | -90.4  | 9  | 1 | 349.7 | 368.0 | 119.3 | 148.4 | 175.0 | 197.6 | 233.5 | 260.5 | 303.5 |
| 120 | T | InChI=1S/C4H11N/c1-4(2)5-3/h4-5H,1-3H3                    | -72.7  | 27 | 2 | 344.6 | 366.2 | 119.6 | 148.6 | 174.9 | 197.5 | 233.6 | 260.9 | 304.2 |

|     |   |                                                |        |    |   |       |       |       |       |       |       |       |       |       |
|-----|---|------------------------------------------------|--------|----|---|-------|-------|-------|-------|-------|-------|-------|-------|-------|
| 121 | T | InChI=1S/C4H11N/c1-4(2,3)5/h5H2,1-3H3          | -115.7 | 81 | 1 | 329.0 | 365.6 | 121.8 | 152.8 | 179.5 | 201.6 | 236.0 | 262.1 | 304.0 |
| 122 | T | InChI=1S/C4H11N/c1-4-5(2)3/h4H2,1-3H3          | -46.9  | 27 | 1 | 340.4 | 367.8 | 115.2 | 144.7 | 172.1 | 195.9 | 233.6 | 261.8 | 305.6 |
| 123 | T | InChI=1S/C4H11NO/c1-3-5(6)4-2/h6H,3-4H2,1-2H3  | -121.3 | 9  | 1 | 363.2 | 381.5 | 146.7 | 179.1 | 206.5 | 229.3 | 264.4 | 290.2 | 330.2 |
| 124 | T | InChI=1S/C4H12N2/c1-4-6(3)5-2/h5H,4H2,1-3H3    | 61.7   | 27 | 4 | 375.3 | 391.2 | 138.1 | 170.6 | 200.5 | 226.4 | 267.7 | 298.8 | 347.4 |
| 125 | T | InChI=1S/C4H3N/c1-2-3-4-5/h1H3                 | 328.1  | 3  | 1 | 289.7 | 298.8 | 80.6  | 93.5  | 104.6 | 114.1 | 129.5 | 141.0 | 158.8 |
| 126 | T | InChI=1S/C4H4N/c1-2-3-4-5/h2-3H,1H2            | 292.5  | 1  | 1 | 305.4 | 305.4 | 83.2  | 101.0 | 115.9 | 128.0 | 146.3 | 159.5 | 179.8 |
| 127 | T | InChI=1S/C4H4N/c1-3-5-4-2/h1,4H,2H2            | 459.3  | 1  | 1 | 304.0 | 304.0 | 91.4  | 110.2 | 124.5 | 135.7 | 152.3 | 164.2 | 181.9 |
| 128 | T | InChI=1S/C4H5N/c1-2-3-4-5/h2-3H,1H3/b3-2+      | 157.8  | 3  | 1 | 308.0 | 317.2 | 86.3  | 103.7 | 119.3 | 132.7 | 154.0 | 170.0 | 194.6 |
| 129 | T | InChI=1S/C4H5N/c1-2-3-4-5/h2H,1,3H2            | 174.3  | 1  | 1 | 318.6 | 318.6 | 85.3  | 103.7 | 119.7 | 133.3 | 154.5 | 170.3 | 194.7 |
| 130 | T | InChI=1S/C4H5N/c1-2-3-4-5/h4-5H,1H3/b5-4+      | 290.3  | 3  | 1 | 323.1 | 332.2 | 88.4  | 105.7 | 121.6 | 135.2 | 156.9 | 173.1 | 198.1 |
| 131 | T | InChI=1S/C4H5N/c1-3-5-4-2/h1,4-5H,2H2          | 345.3  | 1  | 2 | 330.0 | 324.3 | 97.4  | 115.2 | 130.1 | 142.4 | 161.3 | 175.2 | 197.2 |
| 132 | T | InChI=1S/C4H5N/c1-4(2)3-5/h1H2,2H3             | 158.5  | 3  | 1 | 307.0 | 316.2 | 86.7  | 104.6 | 120.2 | 133.4 | 154.4 | 170.1 | 194.6 |
| 133 | T | InChI=1S/C4H6N/c1-2-3-4-5/h3H,2H2,1H3          | 209.6  | 3  | 1 | 335.0 | 344.2 | 90.1  | 110.2 | 127.9 | 142.9 | 166.6 | 184.2 | 211.5 |
| 134 | T | InChI=1S/C4H6N/c1-3-4-5-2/h3H,2H2,1H3          | 343.6  | 3  | 1 | 331.3 | 340.4 | 96.9  | 116.9 | 134.5 | 149.4 | 172.4 | 189.2 | 214.8 |
| 135 | T | InChI=1S/C4H6N/c1-3-5-4-2/h1H,4H2,2H3          | 365.7  | 3  | 1 | 336.7 | 345.8 | 95.5  | 114.9 | 131.9 | 146.3 | 168.9 | 185.8 | 212.2 |
| 136 | T | InChI=1S/C4H6N/c1-3-5-4-2/h3-4H,1-2H2          | 262.6  | 2  | 1 | 299.1 | 304.8 | 91.3  | 118.5 | 142.7 | 162.2 | 189.1 | 205.4 | 225.7 |
| 137 | T | InChI=1S/C4H6N/c1-3-5-4-2/h4H,1H2,2H3          | 324.9  | 3  | 1 | 330.2 | 339.3 | 95.7  | 116.2 | 134.1 | 149.2 | 172.7 | 189.8 | 215.7 |
| 138 | T | InChI=1S/C4H6N/c1-4(2)3-5/h1-2H3               | 190.0  | 18 | 1 | 326.6 | 350.6 | 88.7  | 107.2 | 124.5 | 139.7 | 164.2 | 182.5 | 210.7 |
| 139 | T | InChI=1S/C4H7N/c1-2-3-4-5/h2,5H2,1H3           | 201.4  | 3  | 1 | 331.7 | 340.8 | 102.8 | 124.1 | 142.7 | 158.6 | 183.8 | 202.9 | 233.6 |
| 140 | T | InChI=1S/C4H7N/c1-2-3-4-5/h2-3H2,1H3           | 39.0   | 3  | 1 | 323.5 | 332.6 | 96.6  | 118.4 | 137.9 | 154.4 | 180.7 | 200.4 | 231.3 |
| 141 | T | InChI=1S/C4H7N/c1-2-3-4-5/h2-5H,1H3/b3-2+,5-4- | 121.4  | 3  | 1 | 314.3 | 323.4 | 95.9  | 118.8 | 139.1 | 156.3 | 183.1 | 202.7 | 232.8 |
| 142 | T | InChI=1S/C4H7N/c1-3-4-5-2/h3-4H,1H2,2H3/b5-4-  | 136.7  | 3  | 1 | 312.4 | 321.5 | 96.3  | 120.6 | 141.9 | 159.6 | 186.6 | 206.0 | 235.1 |
| 143 | T | InChI=1S/C4H7N/c1-3-4-5-2/h3-4H,2H2,1H3/b4-3+  | 140.8  | 3  | 1 | 312.5 | 321.6 | 96.9  | 122.0 | 143.7 | 161.3 | 187.1 | 205.4 | 233.9 |
| 144 | T | InChI=1S/C4H7N/c1-3-5-4-2/h1,4H2,2H3           | 164.2  | 3  | 1 | 329.2 | 338.3 | 96.6  | 118.6 | 138.1 | 154.7 | 180.8 | 200.3 | 231.1 |
| 145 | T | InChI=1S/C4H7N/c1-3-5-4-2/h1,5H,4H2,2H3        | 234.6  | 3  | 2 | 339.2 | 342.5 | 102.8 | 124.0 | 142.3 | 157.7 | 182.2 | 200.8 | 230.6 |
| 146 | T | InChI=1S/C4H7N/c1-3-5-4-2/h3-4H,1H2,2H3/b5-4-  | 127.6  | 3  | 1 | 316.4 | 325.5 | 99.8  | 123.3 | 143.1 | 159.3 | 184.4 | 203.1 | 232.5 |
| 147 | T | InChI=1S/C4H7N/c1-3-5-4-2/h3-5H,1-2H2          | 146.6  | 2  | 1 | 319.1 | 324.9 | 108.7 | 131.2 | 150.1 | 166.1 | 191.2 | 209.8 | 238.2 |
| 148 | T | InChI=1S/C4H7N/c1-4(2)3-5/h4H,1-2H3            | 34.9   | 9  | 1 | 315.3 | 333.5 | 97.3  | 119.4 | 138.7 | 155.1 | 181.0 | 200.4 | 231.2 |
| 149 | T | InChI=1S/C4H7N/c1-4(2)5-3/h1,3H2,2H3           | 139.6  | 3  | 1 | 322.5 | 331.6 | 95.6  | 118.3 | 138.2 | 155.0 | 181.3 | 200.9 | 231.4 |
| 150 | T | InChI=1S/C4H8N/c1-3-4(2)5/h3H,1,5H2,2H3        | 128.6  | 6  | 1 | 329.5 | 344.4 | 107.0 | 131.6 | 153.0 | 171.1 | 199.3 | 220.3 | 253.1 |
| 151 | T | InChI=1S/C4H8N/c1-3-4-5-2/h3-5H,1H2,2H3        | 171.7  | 6  | 2 | 335.6 | 344.7 | 102.4 | 126.8 | 148.9 | 167.6 | 197.1 | 219.1 | 253.7 |
| 152 | T | InChI=1S/C4H8N/c1-3-4-5-2/h4H,2-3H2,1H3        | 174.0  | 6  | 1 | 346.5 | 361.4 | 101.7 | 126.0 | 148.0 | 166.9 | 196.8 | 218.8 | 252.4 |



|     |   |                                                         |        |    |   |       |       |       |       |       |       |       |       |       |
|-----|---|---------------------------------------------------------|--------|----|---|-------|-------|-------|-------|-------|-------|-------|-------|-------|
| 153 | T | InChI=1S/C4H8N/c1-3-5-4-2/h5H,1,4H2,2H3                 | 268.7  | 3  | 2 | 348.5 | 351.9 | 106.7 | 131.7 | 153.5 | 171.3 | 198.2 | 218.0 | 249.3 |
| 154 | T | InChI=1S/C4H8N/c1-4(2)3-5/h3,5H,1-2H3                   | 134.7  | 18 | 1 | 325.7 | 349.8 | 98.4  | 121.8 | 143.8 | 162.8 | 193.0 | 215.5 | 250.4 |
| 155 | T | InChI=1S/C4H8N/c1-4(2)3-5/h3H,1,5H2,2H3                 | 139.2  | 6  | 1 | 332.2 | 347.1 | 104.7 | 130.1 | 152.1 | 170.4 | 198.8 | 219.8 | 252.7 |
| 156 | T | InChI=1S/C4H8N/c1-4(2)3-5/h4-5H,1-2H3                   | 184.2  | 9  | 1 | 338.1 | 356.4 | 101.7 | 125.7 | 146.9 | 164.8 | 193.0 | 214.2 | 247.6 |
| 157 | T | InChI=1S/C4H8N/c1-4(2)5-3/h1H2,2-3H3                    | 169.1  | 9  | 1 | 333.1 | 351.4 | 95.4  | 120.8 | 143.6 | 163.0 | 193.4 | 215.8 | 250.7 |
| 158 | T | InChI=1S/C4H8N/c1-4(2)5-3/h3H2,1-2H3                    | 156.7  | 36 | 1 | 335.9 | 365.7 | 101.6 | 124.8 | 146.3 | 164.9 | 194.6 | 216.7 | 251.2 |
| 159 | T | InChI=1S/C4H8N/c1-4-5(2)3/h1H2,2-3H3                    | 289.7  | 9  | 1 | 345.7 | 364.0 | 103.4 | 126.1 | 147.9 | 166.7 | 196.1 | 217.3 | 249.8 |
| 160 | T | InChI=1S/C4H9N/c1-2-3-4-5/h2-3H,4-5H2,1H3/b3-2+         | 34.7   | 3  | 1 | 346.6 | 355.7 | 109.7 | 134.9 | 157.3 | 176.3 | 206.4 | 229.3 | 266.1 |
| 161 | T | InChI=1S/C4H9N/c1-2-3-4-5/h3-4H,2,5H2,1H3/b4-3+         | 18.2   | 3  | 1 | 340.2 | 349.4 | 109.9 | 136.0 | 159.4 | 179.2 | 210.2 | 233.1 | 268.9 |
| 162 | T | InChI=1S/C4H9N/c1-3-4(2)5/h2-3,5H2,1H3                  | 5.4    | 3  | 1 | 338.0 | 347.1 | 108.1 | 135.7 | 159.7 | 179.8 | 210.9 | 233.8 | 269.5 |
| 163 | T | InChI=1S/C4H9N/c1-3-4(2)5/h3-4H,1,5H2,2H3/t4-/m0/s1     | 30.7   | 3  | 2 | 339.2 | 342.6 | 113.1 | 141.0 | 164.0 | 182.7 | 211.4 | 232.9 | 267.8 |
| 164 | T | InChI=1S/C4H9N/c1-3-4-5-2/h3,5H,1,4H2,2H3               | 69.4   | 3  | 2 | 337.9 | 341.3 | 110.9 | 137.6 | 160.8 | 180.1 | 210.3 | 232.8 | 268.6 |
| 165 | T | InChI=1S/C4H9N/c1-3-4-5-2/h4H,3H2,1-2H3/b5-4+           | 20.0   | 9  | 1 | 340.4 | 358.6 | 104.2 | 127.7 | 150.2 | 170.3 | 202.9 | 227.7 | 266.5 |
| 166 | T | InChI=1S/C4H9N/c1-3-5-4-2/h3,5H,1,4H2,2H3               | 36.6   | 3  | 2 | 343.0 | 346.3 | 110.4 | 135.5 | 158.7 | 178.8 | 210.9 | 234.8 | 271.6 |
| 167 | T | InChI=1S/C4H9N/c1-3-5-4-2/h3H,4H2,1-2H3/b5-3+           | 12.3   | 9  | 1 | 334.2 | 352.4 | 105.1 | 130.4 | 153.5 | 173.5 | 205.5 | 229.7 | 267.4 |
| 168 | T | InChI=1S/C4H9N/c1-4(2)3-5/h1,3,5H2,2H3                  | 29.7   | 3  | 1 | 341.7 | 350.9 | 114.0 | 137.1 | 158.5 | 177.1 | 206.9 | 229.7 | 266.3 |
| 169 | T | InChI=1S/C4H9N/c1-4(2)3-5/h3-5H,1-2H3/b5-3+             | 1.6    | 9  | 1 | 335.1 | 353.3 | 104.5 | 130.0 | 153.2 | 173.1 | 204.9 | 228.9 | 266.6 |
| 170 | T | InChI=1S/C4H9N/c1-4(2)3-5/h3H,5H2,1-2H3                 | 5.6    | 9  | 1 | 336.7 | 355.0 | 107.8 | 133.3 | 156.2 | 175.7 | 206.6 | 229.7 | 266.6 |
| 171 | T | InChI=1S/C4H9N/c1-4(2)5-3/h1-3H3                        | 10.1   | 27 | 1 | 336.2 | 363.6 | 97.8  | 122.5 | 146.0 | 166.8 | 200.3 | 225.7 | 265.2 |
| 172 | T | InChI=1S/C4H9N/c1-4(2)5-3/h5H,1H2,2-3H3                 | 23.4   | 9  | 2 | 332.1 | 344.6 | 109.9 | 136.7 | 160.2 | 180.1 | 211.6 | 235.0 | 271.1 |
| 173 | T | InChI=1S/C4H9N/c1-4-5(2)3/h4H,1H2,2-3H3                 | 58.8   | 9  | 1 | 336.2 | 354.4 | 104.7 | 129.5 | 153.0 | 173.8 | 207.2 | 232.3 | 270.5 |
| 174 | T | InChI=1S/C4H9NO/c1-2-3-4(5)6/h2-3H2,1H3,5H2             | -275.3 | 3  | 1 | 371.9 | 381.1 | 123.8 | 150.9 | 175.0 | 195.5 | 227.9 | 251.9 | 289.9 |
| 175 | T | InChI=1S/C4H9NO/c1-3(2)4(5)6/h3H,1-2H3,5H2              | -281.0 | 9  | 1 | 364.8 | 383.0 | 125.6 | 151.9 | 175.4 | 195.5 | 227.3 | 251.2 | 289.2 |
| 176 | T | InChI=1S/C4H9NO/c1-3-4(2)5-6/h4H,3H2,1-2H3/t4-/m1/s1    | -7.2   | 9  | 2 | 375.7 | 388.2 | 126.1 | 150.4 | 173.2 | 193.2 | 225.4 | 249.6 | 287.7 |
| 177 | T | InChI=1S/C4H9NO/c1-3-5-4(2)6/h3H2,1-2H3,5H1             | -264.1 | 9  | 2 | 370.3 | 382.8 | 112.2 | 141.0 | 167.0 | 189.3 | 224.2 | 249.8 | 289.5 |
| 178 | T | InChI=1S/C4H9NO/c1-4(2)3-5-6/h4H,3H2,1-2H3              | -1.2   | 9  | 1 | 368.2 | 386.4 | 121.3 | 148.6 | 173.2 | 194.1 | 226.8 | 251.1 | 288.7 |
| 179 | T | InChI=1S/C4H9NO/c1-4(6)5(2)3/h1-3H3                     | -231.1 | 27 | 1 | 358.6 | 386.0 | 112.5 | 137.8 | 162.4 | 184.4 | 220.1 | 246.8 | 288.1 |
| 180 | T | InChI=1S/C4H9NO2/c1-2-3-4-5(6)7/h2-4H2,1H3              | -151.5 | 6  | 1 | 392.6 | 407.5 | 128.8 | 158.5 | 185.4 | 208.4 | 244.4 | 270.7 | 310.8 |
| 181 | T | InChI=1S/C4H9NO2/c1-3-4(2)5(6)7/h4H,3H2,1-2H3/t4-/m1/s1 | -168.5 | 18 | 2 | 387.3 | 405.6 | 132.9 | 162.3 | 188.6 | 211.0 | 245.9 | 271.6 | 310.9 |
| 182 | T | InChI=1S/C4H9NO2/c1-3-4(2)7-5-6/h4H,3H2,1-2H3/t4-/m1/s1 | -159.7 | 9  | 2 | 391.3 | 403.8 | 142.3 | 172.6 | 198.4 | 219.7 | 252.4 | 276.3 | 313.6 |
| 183 | T | InChI=1S/C4H9NO2/c1-4(2)3-5(6)7/h4H,3H2,1-2H3           | -161.0 | 18 | 1 | 384.8 | 408.8 | 129.3 | 159.9 | 187.2 | 210.1 | 245.6 | 271.5 | 310.9 |
| 184 | T | InChI=1S/C4H9NO2/c1-4(2)3-7-5-6/h4H,3H2,1-2H3           | -150.2 | 9  | 1 | 389.0 | 407.2 | 134.7 | 164.8 | 191.9 | 214.7 | 249.9 | 275.5 | 314.5 |

|     |   |                                                          |        |    |   |       |       |       |       |       |       |       |       |       |
|-----|---|----------------------------------------------------------|--------|----|---|-------|-------|-------|-------|-------|-------|-------|-------|-------|
| 185 | T | InChI=1S/C5H10N/c1-3-4-5(2)6/h3-4H,6H2,1-2H3             | 101.8  | 9  | 1 | 371.7 | 390.0 | 127.5 | 156.7 | 183.4 | 206.4 | 242.7 | 269.6 | 311.5 |
| 186 | T | InChI=1S/C5H10N/c1-3-5(2)4-6/h4,6H,3H2,1-2H3             | 117.3  | 9  | 1 | 369.4 | 387.6 | 121.4 | 151.8 | 179.4 | 202.9 | 239.9 | 267.4 | 310.1 |
| 187 | T | InChI=1S/C5H10N/c1-4-5(2)6-3/h4,6H,1H2,2-3H3             | 138.6  | 18 | 2 | 370.4 | 388.6 | 126.1 | 155.4 | 182.0 | 204.9 | 241.2 | 268.3 | 310.7 |
| 188 | T | InChI=1S/C5H10N/c1-4-6-5(2)3/h2,4H2,1,3H3                | 143.7  | 18 | 1 | 367.4 | 391.5 | 123.6 | 154.3 | 182.0 | 205.6 | 242.8 | 270.2 | 312.5 |
| 189 | T | InChI=1S/C5H10N/c1-4-6-5(2)3/h4H,1-3H3                   | 117.5  | 54 | 1 | 364.1 | 397.2 | 121.8 | 151.4 | 179.9 | 204.9 | 244.0 | 272.0 | 312.8 |
| 190 | T | InChI=1S/C5H10N/c1-5(2)4-6-3/h4H,1-3H3                   | 125.2  | 54 | 1 | 360.4 | 393.6 | 120.6 | 148.2 | 175.0 | 198.7 | 236.9 | 265.5 | 309.6 |
| 191 | T | InChI=1S/C5H11N/c1-2-3-4-5-6/h3-4H,2,5-6H2,1H3/b4-3+     | 16.8   | 3  | 1 | 383.3 | 392.5 | 135.5 | 166.8 | 194.1 | 217.1 | 253.7 | 281.4 | 325.9 |
| 192 | T | InChI=1S/C5H11N/c1-3-4-5-6-2/h3-4,6H,5H2,1-2H3/b4-3+     | 38.9   | 9  | 2 | 373.1 | 385.6 | 135.0 | 165.8 | 193.5 | 217.2 | 254.7 | 282.8 | 327.4 |
| 193 | T | InChI=1S/C5H11N/c1-3-5(2)4-6/h4-6H,3H2,1-2H3             | -15.9  | 9  | 2 | 377.3 | 389.8 | 132.3 | 162.2 | 189.8 | 213.8 | 252.1 | 281.0 | 326.5 |
| 194 | T | InChI=1S/C5H11N/c1-3-5(2)4-6/h4H,3,6H2,1-2H3/b5-4-       | -11.7  | 9  | 1 | 374.3 | 392.5 | 130.4 | 162.1 | 190.6 | 214.8 | 252.9 | 281.3 | 326.2 |
| 195 | T | InChI=1S/C5H11N/c1-3-5-6-4-2/h3,6H,1,4-5H2,2H3           | 43.1   | 3  | 2 | 375.9 | 379.3 | 138.1 | 169.5 | 197.1 | 220.5 | 257.2 | 284.8 | 328.5 |
| 196 | T | InChI=1S/C5H11N/c1-4(2)5(3)6/h5H,1,6H2,2-3H3/t5-/m1/s1   | -2.8   | 9  | 2 | 374.0 | 386.5 | 134.9 | 168.5 | 196.9 | 220.2 | 256.3 | 283.4 | 326.6 |
| 197 | T | InChI=1S/C5H11N/c1-4-5(2)6-3/h4-6H,1H2,2-3H3/t5-/m0/s1   | 38.9   | 9  | 4 | 374.9 | 381.6 | 133.7 | 166.7 | 195.7 | 219.8 | 257.2 | 284.9 | 328.4 |
| 198 | T | InChI=1S/C5H11N/c1-4-5(2)6-3/h4H2,1-3H3/b6-5+            | -10.1  | 27 | 1 | 376.9 | 404.3 | 122.7 | 152.0 | 180.3 | 205.4 | 246.0 | 276.7 | 324.5 |
| 199 | T | InChI=1S/C5H11N/c1-4-5(2,3)6/h4H,1,6H2,2-3H3             | -3.3   | 9  | 1 | 365.0 | 383.2 | 137.2 | 169.9 | 198.0 | 221.2 | 257.1 | 283.9 | 327.1 |
| 200 | T | InChI=1S/C5H11N/c1-4-6(3)5-2/h4H,1,5H2,2-3H3             | 34.8   | 9  | 2 | 366.6 | 379.1 | 131.9 | 162.7 | 190.9 | 215.4 | 254.4 | 283.8 | 329.9 |
| 201 | T | InChI=1S/C5H11N/c1-4-6-5(2)3/h4H2,1-3H3                  | -19.4  | 27 | 1 | 374.6 | 402.0 | 121.5 | 152.7 | 182.1 | 207.7 | 248.8 | 279.5 | 326.7 |
| 202 | T | InChI=1S/C5H11N/c1-4-6-5(2)3/h6H,2,4H2,1,3H3             | -2.1   | 9  | 2 | 368.7 | 381.2 | 136.6 | 168.5 | 196.8 | 220.9 | 259.2 | 287.8 | 331.8 |
| 203 | T | InChI=1S/C5H11N/c1-5(2)4-6-3/h4,6H,1-3H3                 | 13.7   | 27 | 2 | 370.4 | 392.1 | 129.4 | 161.0 | 190.1 | 215.1 | 254.1 | 282.8 | 327.6 |
| 204 | T | InChI=1S/C5H11NO/c1-3-5(4-2)6-7/h5H,3-4H2,1-2H3          | -26.3  | 9  | 1 | 402.3 | 420.5 | 156.8 | 185.8 | 212.5 | 235.9 | 273.8 | 302.5 | 347.9 |
| 205 | T | InChI=1S/C5H11NO/c1-4-5(7)6(2)3/h4H2,1-3H3               | -250.1 | 27 | 1 | 391.5 | 418.9 | 139.6 | 169.3 | 198.4 | 224.5 | 267.1 | 299.1 | 348.5 |
| 206 | T | InChI=1S/C5H11NO/c1-5(2,3)4(6)7/h1-3H3,6H2               | -310.7 | 81 | 1 | 381.0 | 417.5 | 146.2 | 181.4 | 211.7 | 236.8 | 275.6 | 304.3 | 349.3 |
| 207 | T | InChI=1S/C5H11NO2/c1-3-5(4-2)6(7)8/h5H,3-4H2,1-2H3       | -190.2 | 18 | 1 | 414.7 | 438.7 | 159.9 | 194.6 | 226.1 | 252.9 | 294.6 | 325.0 | 371.5 |
| 208 | T | InChI=1S/C5H11NO2/c1-5(2,3)4-6(7)8/h4H2,1-3H3            | -191.4 | 16 | 1 | 400.2 | 442.5 | 155.3 | 192.3 | 225.0 | 252.2 | 294.1 | 324.5 | 370.6 |
| 209 | T | InChI=1S/C5H12N/c1-4-5(2)6-3/h6H,4H2,1-3H3               | 76.1   | 27 | 1 | 391.0 | 418.4 | 140.2 | 170.8 | 199.8 | 225.2 | 265.8 | 296.4 | 344.4 |
| 210 | T | InChI=1S/C5H12N2/c1-3-5-7-6-4-2/h3-5H2,1-2H3             | 86.7   | 9  | 1 | 418.7 | 436.9 | 147.1 | 181.3 | 212.7 | 239.8 | 283.0 | 315.4 | 365.8 |
| 211 | T | InChI=1S/C5H13N/c1-2-3-4-5-6/h2-6H2,1H3                  | -99.5  | 3  | 1 | 397.3 | 406.4 | 145.3 | 177.6 | 208.3 | 235.1 | 278.2 | 310.8 | 362.6 |
| 212 | T | InChI=1S/C5H13N/c1-3-4-5(2)6/h5H,3-4,6H2,1-2H3/t5-/m1/s1 | -116.0 | 9  | 2 | 392.4 | 404.9 | 146.0 | 180.8 | 211.8 | 238.3 | 280.4 | 312.4 | 363.2 |
| 213 | T | InChI=1S/C5H13N/c1-3-5(6)4-2/h5H,3-4,6H2,1-2H3           | -113.1 | 9  | 1 | 386.5 | 404.8 | 147.9 | 181.1 | 211.6 | 238.1 | 280.2 | 312.2 | 363.1 |
| 214 | T | InChI=1S/C5H13N/c1-4-5(2,3)6/h4,6H2,1-3H3                | -130.5 | 27 | 1 | 375.5 | 402.9 | 144.4 | 181.0 | 213.1 | 239.9 | 281.9 | 313.3 | 363.5 |
| 215 | T | InChI=1S/C5H13N/c1-4-6-5(2)3/h5-6H,4H2,1-3H3             | -98.6  | 27 | 2 | 382.6 | 404.2 | 145.1 | 180.2 | 211.5 | 238.4 | 281.3 | 313.6 | 364.6 |
| 216 | T | InChI=1S/C5H13N/c1-5(2,3)6-4/h6H,1-4H3                   | -102.7 | 24 | 2 | 359.9 | 399.8 | 142.2 | 179.0 | 211.3 | 238.4 | 281.0 | 312.9 | 363.6 |

|     |   |                                                                |       |    |   |       |       |       |       |       |       |       |       |       |
|-----|---|----------------------------------------------------------------|-------|----|---|-------|-------|-------|-------|-------|-------|-------|-------|-------|
| 217 | T | InChI=1S/C5H4N/c1-3-5-6-4-2/h2H,1H3                            | 625.7 | 3  | 1 | 354.1 | 363.2 | 106.6 | 123.9 | 138.1 | 150.0 | 168.6 | 182.4 | 203.5 |
| 218 | T | InChI=1S/C5H6N/c1-2-3-4-5-6/h2-4H,1H3                          | 257.9 | 3  | 1 | 343.8 | 353.0 | 104.6 | 127.0 | 146.9 | 163.7 | 189.8 | 209.0 | 238.4 |
| 219 | T | InChI=1S/C5H6N/c1-3-5(2)4-6/h3H,2H2,1H3                        | 276.1 | 6  | 1 | 334.7 | 349.6 | 106.2 | 129.4 | 149.2 | 165.6 | 191.0 | 209.6 | 238.5 |
| 220 | T | InChI=1S/C5H6N/c1-3-5-6-4-2/h4H,2H2,1H3                        | 421.1 | 3  | 1 | 352.8 | 361.9 | 112.1 | 135.8 | 155.7 | 172.3 | 197.9 | 216.4 | 243.9 |
| 221 | T | InChI=1S/C5H6N/c1-4-6-5(2)3/h1H,2H2,3H3                        | 421.3 | 3  | 1 | 353.2 | 362.3 | 125.1 | 148.8 | 167.5 | 182.6 | 205.8 | 222.7 | 248.4 |
| 222 | T | InChI=1S/C5H7N/c1-2-3-4-5-6/h2-3H,4H2,1H3/b3-2+                | 142.1 | 3  | 1 | 354.7 | 363.8 | 108.3 | 131.4 | 152.2 | 170.2 | 198.9 | 220.3 | 253.5 |
| 223 | T | InChI=1S/C5H7N/c1-3-4-5-6-2/h5H,1-2H3/b6-5+                    | 284.2 | 9  | 1 | 365.5 | 383.7 | 108.7 | 131.4 | 152.6 | 171.1 | 200.8 | 223.0 | 257.0 |
| 224 | T | InChI=1S/C5H7N/c1-3-5(2)4-6/h2-3H2,1H3                         | 138.6 | 3  | 1 | 346.7 | 355.9 | 109.4 | 133.8 | 154.9 | 172.7 | 200.7 | 221.5 | 254.0 |
| 225 | T | InChI=1S/C5H7N/c1-3-5(2)4-6/h3H,1-2H3/b5-3-                    | 121.9 | 9  | 1 | 341.4 | 359.7 | 109.2 | 131.5 | 151.9 | 169.6 | 198.3 | 219.8 | 253.2 |
| 226 | T | InChI=1S/C5H7N/c1-3-5-6-4-2/h2-3,5-6H,1H3/b5-3+                | 321.2 | 3  | 2 | 366.0 | 369.4 | 118.5 | 141.6 | 161.8 | 178.8 | 205.3 | 224.9 | 255.5 |
| 227 | T | InChI=1S/C5H7N/c1-4-6-5(2)3/h1,6H,2H2,3H3                      | 306.1 | 3  | 2 | 356.8 | 360.2 | 119.3 | 143.5 | 163.9 | 180.9 | 207.4 | 226.9 | 257.2 |
| 228 | T | InChI=1S/C5H7N/c1-5(2)3-4-6/h1,3H2,2H3                         | 137.1 | 3  | 1 | 347.8 | 356.9 | 108.7 | 132.7 | 153.7 | 171.5 | 199.8 | 220.9 | 253.7 |
| 229 | T | InChI=1S/C5H7N/c1-5(2)3-4-6/h3H,1-2H3                          | 116.1 | 9  | 1 | 341.6 | 359.8 | 109.5 | 131.9 | 152.3 | 170.1 | 198.6 | 220.0 | 253.3 |
| 230 | T | InChI=1S/C5H8N/c1-3-5(2)4-6/h3H2,1-2H3                         | 170.1 | 9  | 1 | 373.4 | 391.7 | 110.8 | 135.7 | 158.6 | 178.3 | 209.9 | 233.5 | 270.0 |
| 231 | T | InChI=1S/C5H8N/c1-3-5-6-4-2/h3-4H,1-2H3                        | 302.6 | 9  | 1 | 369.9 | 388.1 | 114.9 | 140.6 | 163.9 | 184.0 | 215.6 | 238.8 | 273.9 |
| 232 | T | InChI=1S/C5H8N/c1-4-6-5(2)3/h1,5H,2-3H3                        | 333.1 | 3  | 1 | 373.7 | 382.8 | 123.2 | 148.1 | 169.8 | 188.1 | 216.7 | 238.2 | 271.9 |
| 233 | T | InChI=1S/C5H8N/c1-4-6-5(2)3/h4H,1-2H2,3H3                      | 234.0 | 12 | 1 | 329.8 | 350.5 | 121.7 | 152.8 | 178.5 | 199.7 | 231.3 | 252.6 | 281.8 |
| 234 | T | InChI=1S/C5H8N/c1-5(2)3-4-6/h5-6H,1-2H3                        | 313.4 | 9  | 1 | 368.2 | 386.4 | 123.2 | 148.9 | 171.3 | 190.1 | 219.5 | 241.3 | 275.7 |
| 235 | T | InChI=1S/C5H9N/c1-3-5(2)4-6/h5H,3H2,1-2H3/t5-/m0/s1            | 14.4  | 9  | 2 | 359.5 | 372.0 | 122.9 | 149.9 | 174.2 | 194.9 | 227.7 | 252.3 | 291.0 |
| 236 | T | InChI=1S/C5H9N/c1-3-5(6)4-2/h3-5H,1-2,6H2                      | 142.2 | 1  | 1 | 361.4 | 361.4 | 130.9 | 159.6 | 183.3 | 202.6 | 232.5 | 254.9 | 291.1 |
| 237 | T | InChI=1S/C5H9N/c1-3-5-6-4-2/h3,5H,1,4H2,2H3/b6-5-              | 110.5 | 3  | 1 | 349.3 | 358.4 | 119.6 | 151.3 | 178.4 | 200.6 | 234.1 | 258.3 | 294.9 |
| 238 | T | InChI=1S/C5H9N/c1-3-5-6-4-2/h3-6H,2H2,1H3/b5-3+                | 124.0 | 3  | 2 | 364.7 | 368.1 | 129.9 | 157.0 | 181.0 | 201.7 | 234.6 | 258.9 | 296.2 |
| 239 | T | InChI=1S/C5H9N/c1-4-6-5(2)3/h1,5-6H,2-3H3                      | 199.3 | 9  | 2 | 358.9 | 371.4 | 128.5 | 156.1 | 179.6 | 199.2 | 230.0 | 253.3 | 290.6 |
| 240 | T | InChI=1S/C5H9N/c1-4-6-5(2)3/h4,6H,1-2H2,3H3                    | 111.2 | 3  | 2 | 357.4 | 360.8 | 126.3 | 155.4 | 181.0 | 202.3 | 235.0 | 258.7 | 294.9 |
| 241 | T | InChI=1S/C5H9N/c1-4-6-5(2)3/h4H,2H2,1,3H3/b6-4-                | 94.7  | 9  | 1 | 357.7 | 375.9 | 119.7 | 146.8 | 171.3 | 192.3 | 225.8 | 250.9 | 290.1 |
| 242 | T | InChI=1S/C5H9N/c1-5(2)3-4-6/h3-4,6H,1-2H3/b6-4-                | 84.1  | 9  | 1 | 347.7 | 366.0 | 120.8 | 148.0 | 172.7 | 194.0 | 227.9 | 253.1 | 291.8 |
| 243 | T | InChI=1S/C5H9N/c1-5(2,3)4-6/h1-3H3                             | 2.9   | 81 | 1 | 331.8 | 368.3 | 123.7 | 152.4 | 177.0 | 197.6 | 229.6 | 253.6 | 291.5 |
| 244 | T | InChI=1S/C6H11N/c1-3-5-6(7)4-2/h3-6H,2,7H2,1H3/b5-3-/t6-/m0/s1 | 117.8 | 3  | 2 | 402.5 | 405.9 | 150.7 | 184.6 | 214.1 | 238.7 | 276.9 | 305.2 | 350.0 |
| 245 | T | InChI=1S/C6H11N/c1-3-6(2)4-5-7/h4-5,7H,3H2,1-2H3/b6-4+,7-5+    | 67.3  | 9  | 1 | 383.7 | 401.9 | 141.6 | 175.9 | 207.0 | 233.5 | 274.9 | 305.3 | 351.8 |
| 246 | T | InChI=1S/C6H11N/c1-3-6(4-2)5-7/h6H,3-4H2,1-2H3                 | -6.0  | 9  | 1 | 390.3 | 408.5 | 149.2 | 181.0 | 210.0 | 234.9 | 274.6 | 304.3 | 350.8 |
| 247 | T | InChI=1S/C6H11N/c1-4-6(2,3)5-7/h4H2,1-3H3                      | -16.2 | 27 | 1 | 380.5 | 407.9 | 147.5 | 182.0 | 211.9 | 236.9 | 276.1 | 305.3 | 351.2 |
| 248 | T | InChI=1S/C6H11N/c1-4-6(5-2)7-3/h4-7H,1-2H2,3H3                 | 147.1 | 3  | 1 | 385.1 | 394.2 | 150.9 | 189.0 | 220.2 | 245.1 | 282.5 | 309.8 | 353.0 |

|     |   |                                                                  |        |    |   |       |       |       |       |       |       |       |       |       |
|-----|---|------------------------------------------------------------------|--------|----|---|-------|-------|-------|-------|-------|-------|-------|-------|-------|
| 249 | T | InChI=1S/C6H11N/c1-5(2)7-6(3)4/h7H,1,3H2,2,4H3                   | 83.4   | 9  | 1 | 394.0 | 412.3 | 150.4 | 184.5 | 213.7 | 238.3 | 276.5 | 305.0 | 349.9 |
| 250 | T | InChI=1S/C6H11N/c1-6(2)4-5-7-3/h4-5H,1-3H3/b7-5-                 | 75.4   | 27 | 1 | 383.7 | 411.1 | 144.7 | 176.6 | 206.0 | 231.8 | 273.1 | 304.0 | 351.3 |
| 251 | T | InChI=1S/C6H11NO2/c1-3-5-6(4-2)9-7-8/h3,6H,1,4-5H2,2H3/t6-/m0/s1 | -71.1  | 3  | 2 | 459.5 | 462.9 | 178.9 | 218.6 | 252.7 | 280.5 | 322.3 | 352.1 | 397.3 |
| 252 | T | InChI=1S/C6H13N/c1-5-6(2,3)7-4/h5,7H,1H2,2-4H3                   | 7.7    | 27 | 2 | 396.3 | 418.0 | 163.4 | 201.3 | 234.5 | 262.2 | 305.1 | 337.1 | 387.9 |
| 253 | T | InChI=1S/C6H13N/c1-5-7(4)6(2)3/h5-6H,1H2,2-4H3                   | 6.2    | 27 | 2 | 393.8 | 415.4 | 155.5 | 194.2 | 228.3 | 257.1 | 302.5 | 336.4 | 389.7 |
| 254 | T | InChI=1S/C6H13NO/c1-4-5-6(8)7(2)3/h4-5H2,1-3H3                   | -269.6 | 27 | 1 | 426.3 | 453.7 | 163.6 | 200.0 | 234.8 | 265.6 | 315.0 | 352.0 | 409.0 |
| 255 | T | InChI=1S/C6H13NO/c1-4-7(5-2)6(3)8/h4-5H2,1-3H3                   | -284.3 | 27 | 1 | 421.0 | 448.4 | 167.1 | 206.2 | 241.8 | 272.2 | 320.1 | 355.6 | 410.5 |
| 256 | T | InChI=1S/C6H15N/c1-3-5-7-6-4-2/h7H,3-6H2,1-2H3                   | -103.3 | 9  | 1 | 427.4 | 445.7 | 168.4 | 206.6 | 242.7 | 274.3 | 325.1 | 363.4 | 423.5 |
| 257 | T | InChI=1S/C6H15N/c1-4-7(5-2)6-3/h4-6H2,1-3H3                      | -86.8  | 81 | 1 | 402.8 | 439.3 | 170.4 | 206.3 | 241.8 | 273.8 | 325.8 | 365.0 | 425.6 |
| 258 | T | InChI=1S/C6H15N/c1-5(2)7-6(3)4/h5-7H,1-4H3                       | -127.0 | 81 | 1 | 407.4 | 443.9 | 168.7 | 210.7 | 248.5 | 280.6 | 330.6 | 367.6 | 424.9 |
| 259 | T | InChI=1S/C6H6N/c1-3-5-7-6-4-2/h1-2H3                             | 585.6  | 18 | 1 | 401.7 | 425.7 | 127.4 | 149.5 | 169.3 | 186.5 | 214.1 | 234.5 | 265.7 |
| 260 | T | InChI=1S/C6H7N/c1-6(2)4-3-5-7/h6H,1-2H3                          | 284.1  | 9  | 1 | 362.1 | 380.3 | 126.0 | 152.2 | 174.5 | 193.0 | 222.2 | 243.9 | 277.6 |
| 261 | T | InChI=1S/C6H8N/c1-3-4-6(2)5-7/h3H,1,4H2,2H3                      | 282.9  | 3  | 1 | 396.3 | 405.4 | 130.2 | 155.3 | 178.8 | 199.3 | 231.8 | 256.0 | 293.3 |
| 262 | T | InChI=1S/C6H8N/c1-6(2)4-3-5-7/h3-4H,1-2H3                        | 222.3  | 18 | 1 | 370.7 | 394.7 | 125.2 | 153.1 | 178.2 | 199.7 | 233.5 | 258.5 | 296.8 |
| 263 | T | InChI=1S/C6H9N/c1-3-6(2)4-5-7/h4H,3H2,1-2H3/b6-4+                | 99.1   | 9  | 1 | 377.2 | 395.5 | 131.6 | 161.3 | 187.5 | 209.8 | 245.2 | 271.6 | 312.8 |
| 264 | T | InChI=1S/C7H11N/c1-3-5-7(4-2)6-8/h3,7H,1,4-5H2,2H3/t7-/m1/s1     | 104.4  | 3  | 2 | 422.3 | 425.7 | 162.0 | 197.3 | 228.4 | 254.7 | 295.9 | 326.5 | 374.1 |
| 265 | T | InChI=1S/C7H11N/c1-4-5-7(2,3)6-8/h4H,1,5H2,2-3H3                 | 92.6   | 9  | 1 | 401.2 | 419.5 | 166.6 | 203.0 | 234.2 | 260.1 | 300.0 | 329.4 | 375.5 |
| 266 | T | InChI=1S/C7H13N/c1-4-5-7(2,3)6-8/h4-5H2,1-3H3                    | -35.3  | 27 | 1 | 412.4 | 439.8 | 175.2 | 216.4 | 250.8 | 279.5 | 324.5 | 358.3 | 411.6 |
| 267 | T | InChI=1S/C7H14N/c1-4-7(3)6-8-5-2/h6H,4-5H2,1-3H3                 | 81.1   | 27 | 1 | 437.9 | 465.3 | 165.1 | 207.1 | 245.5 | 278.3 | 330.3 | 368.9 | 428.7 |
| 268 | T | InChI=1S/C7H17N/c1-4-5-8-6-7(2)3/h7-8H,4-6H2,1-3H3               | -130.0 | 27 | 2 | 466.2 | 487.9 | 194.1 | 239.9 | 281.8 | 317.7 | 374.8 | 417.6 | 484.1 |
| 269 | T | InChI=1S/C8H19N/c1-3-5-7-9-8-6-4-2/h9H,3-8H2,1-2H3               | -139.6 | 9  | 1 | 513.6 | 531.9 | 220.3 | 267.8 | 313.3 | 353.4 | 417.9 | 466.6 | 542.8 |
| 270 | T | InChI=1S/CH2N/c1-2/h1-2H                                         | 274.4  | 1  | 1 | 228.4 | 228.4 | 38.2  | 43.0  | 47.5  | 51.5  | 57.8  | 62.8  | 70.9  |
| 271 | T | InChI=1S/CH2N/c1-2/h1H2                                          | 239.3  | 1  | 1 | 224.0 | 224.0 | 37.6  | 42.3  | 46.9  | 51.0  | 57.9  | 63.2  | 71.6  |
| 272 | T | InChI=1S/CH3N/c1-2/h2H,1H2                                       | 90.0   | 1  | 1 | 227.0 | 227.0 | 37.8  | 44.3  | 51.2  | 57.6  | 68.2  | 76.3  | 89.3  |
| 273 | T | InChI=1S/CH3NO/c1-2-3/h1H3                                       | 68.6   | 3  | 1 | 260.3 | 269.4 | 52.1  | 60.4  | 68.5  | 75.8  | 87.5  | 96.3  | 110.0 |
| 274 | T | InChI=1S/CH3NO2/c1-2(3)4/h1H3                                    | -83.8  | 6  | 1 | 275.3 | 290.2 | 57.2  | 69.7  | 81.1  | 90.8  | 105.8 | 116.5 | 132.4 |
| 275 | T | InChI=1S/CH3NO2/c1-4-2-3/h1H3                                    | -69.6  | 3  | 1 | 286.5 | 295.7 | 64.3  | 74.9  | 84.9  | 93.7  | 107.6 | 117.8 | 133.2 |
| 276 | T | InChI=1S/CH4N/c1-2/h1-2H2                                        | 153.7  | 2  | 1 | 246.0 | 251.7 | 51.0  | 60.1  | 67.9  | 74.5  | 84.9  | 93.1  | 107.0 |
| 277 | T | InChI=1S/CH4N/c1-2/h2H,1H3                                       | 181.0  | 3  | 1 | 245.7 | 254.8 | 45.4  | 53.4  | 61.5  | 68.9  | 81.2  | 90.7  | 106.3 |
| 278 | T | InChI=1S/CH4NO/c1-2-3/h2H,1H3                                    | 43.6   | 3  | 2 | 279.2 | 282.6 | 56.1  | 66.2  | 76.3  | 85.3  | 100.0 | 111.2 | 128.7 |
| 279 | T | InChI=1S/CH4NO/c1-2-3/h3H,1H3                                    | 67.4   | 3  | 1 | 272.2 | 281.3 | 57.7  | 68.6  | 78.9  | 87.8  | 101.9 | 112.4 | 129.1 |
| 280 | T | InChI=1S/CH5N/c1-2/h2H2,1H3                                      | -19.5  | 3  | 1 | 241.5 | 250.6 | 49.5  | 59.4  | 69.2  | 78.0  | 92.8  | 104.6 | 124.1 |

|     |   |                                                                   |        |    |   |       |       |       |       |       |       |       |       |       |
|-----|---|-------------------------------------------------------------------|--------|----|---|-------|-------|-------|-------|-------|-------|-------|-------|-------|
| 281 | T | InChI=1S/CH6N2/c1-3-2/h3H,2H2,1H3                                 | 97.0   | 3  | 2 | 278.6 | 282.0 | 72.8  | 88.1  | 101.2 | 112.2 | 129.8 | 143.4 | 165.9 |
| 282 | V | InChI=1S/C3H8N2/c1-2-3(4)5/h2H,4-5H2,1H3                          | 31.2   | 3  | 1 | 325.1 | 334.2 | 112.4 | 142.0 | 165.0 | 182.0 | 205.3 | 221.9 | 249.7 |
| 283 | V | InChI=1S/C4H10N/c1-2-3-4-5/h5H,2-4H2,1H3                          | 122.1  | 3  | 1 | 366.4 | 375.6 | 115.6 | 141.1 | 165.2 | 186.1 | 219.6 | 244.8 | 284.7 |
| 284 | V | InChI=1S/C4H10N2/c1-2-3-6-4-5/h2,6H,1,3-5H2                       | 88.2   | 1  | 2 | 384.9 | 379.2 | 136.4 | 165.4 | 190.8 | 212.0 | 244.7 | 269.1 | 308.1 |
| 285 | V | InChI=1S/C4H10NO/c1-3-5(6)4-2/h3-4H2,1-2H3                        | -29.7  | 9  | 1 | 381.9 | 400.2 | 125.6 | 153.1 | 179.0 | 201.5 | 237.6 | 264.6 | 306.9 |
| 286 | V | InChI=1S/C4H8N/c1-3-4(2)5/h5H,2-3H2,1H3                           | 157.7  | 6  | 1 | 331.1 | 346.0 | 99.4  | 125.6 | 148.2 | 167.0 | 196.0 | 217.4 | 251.1 |
| 287 | V | InChI=1S/C5H10N/c1-5(2)4-6-3/h4-5H,3H2,1-2H3                      | 148.4  | 18 | 1 | 373.7 | 397.8 | 126.4 | 157.2 | 184.6 | 207.8 | 244.1 | 270.9 | 312.1 |
| 288 | V | InChI=1S/C5H11N/c1-3-4-5(2)6/h4H,3,6H2,1-2H3/b5-4-                | -21.5  | 9  | 1 | 373.1 | 391.3 | 128.4 | 161.8 | 191.3 | 216.2 | 254.9 | 283.4 | 327.8 |
| 289 | V | InChI=1S/C5H11N/c1-3-5-6-4-2/h5H,3-4H2,1-2H3/b6-5-                | -4.0   | 9  | 1 | 375.3 | 393.6 | 127.3 | 158.6 | 187.2 | 211.7 | 250.9 | 280.4 | 326.5 |
| 290 | V | InChI=1S/C5H11NO2/c1-3-5(4-2)8-6-7/h5H,3-4H2,1-2H3                | -180.1 | 9  | 1 | 420.8 | 439.1 | 167.6 | 203.5 | 234.9 | 260.9 | 300.5 | 329.3 | 373.9 |
| 291 | V | InChI=1S/C5H12N2/c1-3-4-5(6)7-2/h3-5,7H,6H2,1-2H3/b4-3+/t5-/m1/s1 | 45.4   | 9  | 2 | 400.7 | 413.2 | 158.9 | 199.0 | 233.5 | 260.8 | 300.2 | 327.8 | 371.0 |
| 292 | V | InChI=1S/C5H12N2/c1-3-4-5-7-6-2/h3-5H2,1-2H3                      | 93.4   | 9  | 1 | 412.6 | 430.9 | 150.1 | 183.3 | 214.1 | 240.9 | 283.9 | 316.3 | 366.6 |
| 293 | V | InChI=1S/C5H8N/c1-5(2)3-4-6/h3,5H,1-2H3                           | 183.2  | 9  | 1 | 364.1 | 382.4 | 114.8 | 141.3 | 164.3 | 183.6 | 213.8 | 236.2 | 271.2 |
| 294 | V | InChI=1S/C6H11N/c1-4-5-7-6(2)3/h5H,2,4H2,1,3H3/b7-5+              | 75.9   | 9  | 1 | 400.8 | 419.0 | 141.9 | 174.6 | 204.4 | 230.0 | 270.7 | 301.3 | 349.0 |
| 295 | V | InChI=1S/C6H13N/c1-4-5-6(2,3)7/h4-5H,7H2,1-3H3/b5-4+              | -33.3  | 27 | 1 | 402.3 | 429.7 | 159.4 | 197.0 | 230.0 | 257.8 | 301.3 | 333.9 | 386.0 |
| 296 | V | InChI=1S/C6H13NO/c1-4-6(8)7(3)5-2/h4-5H2,1-3H3                    | -278.3 | 27 | 2 | 438.4 | 460.1 | 162.5 | 200.3 | 235.6 | 266.5 | 315.9 | 352.6 | 409.2 |
| 297 | V | InChI=1S/C6H13NO2/c1-4-6(2,3)5-7(8)9/h4-5H2,1-3H3                 | -206.6 | 54 | 1 | 440.3 | 473.5 | 185.2 | 227.5 | 264.3 | 295.1 | 342.6 | 377.3 | 430.4 |
| 298 | V | InChI=1S/C6H14N/c1-4-6(2,3)5-7/h5H,4,7H2,1-3H3                    | 31.1   | 27 | 1 | 414.9 | 442.3 | 170.1 | 210.7 | 245.2 | 273.8 | 318.4 | 351.8 | 405.0 |
| 299 | V | InChI=1S/C6H15N/c1-4-6(2,3)5-7/h4-5,7H2,1-3H3                     | -138.8 | 27 | 1 | 411.4 | 438.8 | 170.3 | 212.4 | 249.6 | 280.7 | 329.3 | 365.7 | 423.5 |
| 300 | V | InChI=1S/C6H8N2/c7-5-3-1-2-4-6/h1-4H2                             | 166.8  | 2  | 1 | 405.7 | 411.5 | 150.2 | 178.3 | 202.6 | 223.2 | 255.9 | 280.5 | 318.5 |

### 3. Differences between CBS-QB3 and GA approximated thermodynamic properties

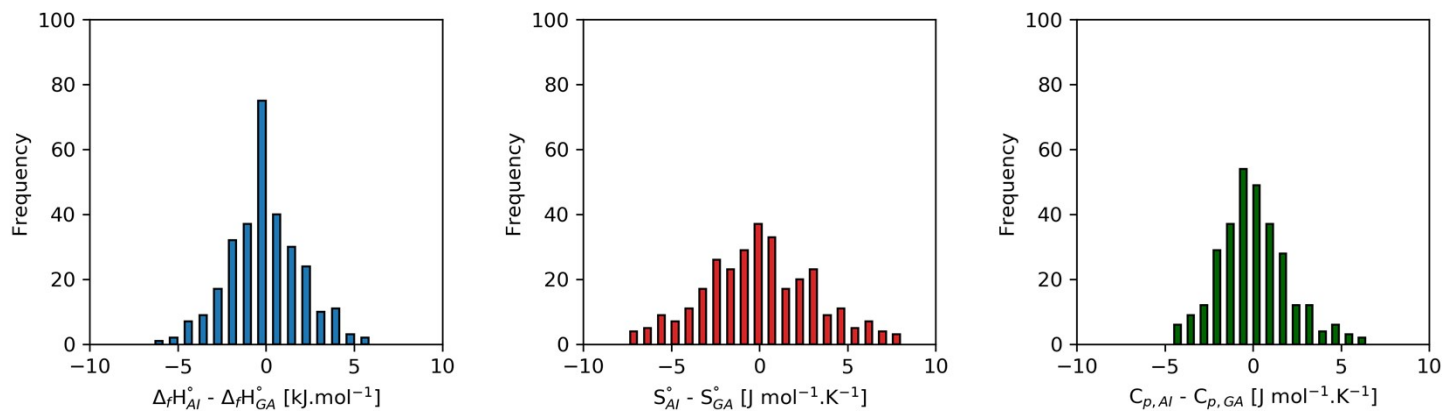

Figure S1: Distribution of the differences between *ab initio* calculated (AI) and group additive approximated values (GA) for the (a) standard enthalpy of formation [kJ mol<sup>-1</sup>], (b) entropy and (c) heat capacity [J mol<sup>-1</sup> K<sup>-1</sup>].

Table S3: Differences between the *ab initio* calculated (AI) and group additive approximated (GA) values for the standard enthalpy of formation [kJ mol<sup>-1</sup>], intrinsic standard entropy [J mol<sup>-1</sup> K<sup>-1</sup>] at 298 K and the heat capacities [J mol<sup>-1</sup> K<sup>-1</sup>] at different temperatures for all 300 molecules. The GA approximations obtained with the final set of GAVs is used.

| No. |   | InChI                           | $\Delta = AI - GA$   |                   |               |       |       |       |       |        |        |  |
|-----|---|---------------------------------|----------------------|-------------------|---------------|-------|-------|-------|-------|--------|--------|--|
|     |   |                                 | $\Delta_f H^{\circ}$ | $S_{int}^{\circ}$ | $C_p^{\circ}$ |       |       |       |       |        |        |  |
|     |   |                                 |                      |                   | 300 K         | 400 K | 500 K | 600 K | 800 K | 1000 K | 1500 K |  |
| 1   | T | InChI=1S/C2H2N/c1-2-3/h1,3H     | 1.0                  | -2.7              | -1.4          | -1.5  | -1.7  | -1.9  | -2.2  | -2.4   | -2.7   |  |
| 2   | T | InChI=1S/C2H2N/c1-2-3/h1H2      | 0.0                  | 0.0               | 0.0           | 0.0   | 0.0   | 0.0   | 0.0   | 0.0    | 0.0    |  |
| 3   | T | InChI=1S/C2H3N/c1-2-3/h1H,3H2   | -3.1                 | 0.5               | -2.4          | -2.2  | -2.2  | -2.3  | -2.5  | -2.7   | -2.8   |  |
| 4   | T | InChI=1S/C2H3N/c1-2-3/h1H3      | 0.0                  | 0.0               | 0.0           | 0.0   | 0.0   | 0.0   | 0.0   | 0.0    | 0.0    |  |
| 5   | T | InChI=1S/C2H3N/c1-2-3/h3H,1H2   | -6.5                 | -2.7              | 1.9           | 2.3   | 2.3   | 2.1   | 1.6   | 1.2    | 0.7    |  |
| 6   | T | InChI=1S/C2H4N/c1-2-3/h1,3H2    | -1.2                 | -2.1              | 4.7           | 4.4   | 3.8   | 3.2   | 2.3   | 1.9    | 1.3    |  |
| 7   | T | InChI=1S/C2H4N/c1-2-3/h1-2H,3H2 | 3.8                  | 0.4               | -0.7          | -0.5  | -0.2  | 0.1   | 0.5   | 0.6    | 0.4    |  |
| 8   | T | InChI=1S/C2H4N/c1-2-3/h2-3H,1H2 | 0.4                  | -3.9              | 1.7           | 1.8   | 1.6   | 1.3   | 0.8   | 0.5    | 0.2    |  |
| 9   | T | InChI=1S/C2H4N/c1-2-3/h2H,1H3   | 0.7                  | 3.9               | -1.5          | -1.5  | -1.4  | -1.2  | -0.8  | -0.6   | -0.3   |  |

|    |   |                                                       |      |      |      |      |      |      |      |      |      |
|----|---|-------------------------------------------------------|------|------|------|------|------|------|------|------|------|
| 10 | T | InChI=1S/C2H4N/c1-2-3/h3H,1H3                         | -0.4 | -0.5 | 0.7  | 0.6  | 0.5  | 0.4  | 0.1  | 0.0  | 0.0  |
| 11 | T | InChI=1S/C2H4N/c1-3-2/h1-2H2                          | 0.0  | 0.0  | 0.0  | 0.0  | 0.0  | 0.0  | 0.0  | 0.0  | 0.0  |
| 12 | T | InChI=1S/C2H4N/c1-3-2/h1H,2H3                         | 0.9  | -2.0 | -2.0 | -1.2 | -0.8 | -0.6 | -0.3 | -0.3 | -0.2 |
| 13 | T | InChI=1S/C2H5N/c1-2-3/h2-3H,1H3/b3-2+                 | -0.2 | 2.2  | -0.9 | -0.7 | -0.5 | -0.5 | -0.5 | -0.5 | -0.3 |
| 14 | T | InChI=1S/C2H5N/c1-2-3/h2H,1,3H2                       | -2.8 | 4.1  | -1.5 | -1.7 | -1.7 | -1.6 | -1.4 | -1.1 | -0.8 |
| 15 | T | InChI=1S/C2H5N/c1-3-2/h1H2,2H3                        | 0.2  | 2.4  | 0.2  | 0.5  | 0.6  | 0.6  | 0.6  | 0.5  | 0.2  |
| 16 | T | InChI=1S/C2H5NO/c1-2(3)4/h1H3,3H2                     | -0.3 | -1.9 | 0.2  | 1.0  | 1.5  | 1.6  | 1.1  | 0.6  | 0.0  |
| 17 | T | InChI=1S/C2H5NO/c1-2-3-4/h2H2,1H3                     | -0.9 | 3.2  | 2.5  | 1.1  | 0.4  | 0.0  | -0.1 | -0.1 | 0.1  |
| 18 | T | InChI=1S/C2H5NO/c1-3-2-4/h2H,1H3,3H1                  | 4.2  | -2.3 | -0.3 | 0.0  | 0.2  | 0.3  | 0.4  | 0.4  | 0.3  |
| 19 | T | InChI=1S/C2H5NO2/c1-2-5-3-4/h2H2,1H3                  | -0.1 | 8.2  | 3.1  | 1.9  | 1.2  | 0.7  | 0.3  | 0.2  | 0.1  |
| 20 | T | InChI=1S/C2H6N/c1-2-3/h2H,3H2,1H3                     | -0.4 | -0.9 | 0.6  | 0.3  | 0.4  | 0.6  | 0.9  | 1.0  | 0.9  |
| 21 | T | InChI=1S/C2H6N/c1-2-3/h3H,2H2,1H3                     | -2.0 | 0.5  | 0.6  | 0.4  | 0.2  | 0.1  | 0.0  | 0.0  | 0.0  |
| 22 | T | InChI=1S/C2H6N/c1-3-2/h1-2H3                          | -0.1 | 2.7  | -1.5 | -1.3 | -1.1 | -0.8 | -0.4 | -0.2 | 0.1  |
| 23 | T | InChI=1S/C2H6N/c1-3-2/h3H,1H2,2H3                     | -0.4 | -1.1 | -0.4 | -0.4 | -0.5 | -0.4 | -0.2 | 0.0  | 0.3  |
| 24 | T | InChI=1S/C2H6N2/c1-2(3)4/h1,3-4H2                     | -2.2 | 0.1  | -0.2 | 0.1  | 0.3  | 0.4  | 0.2  | 0.1  | 0.0  |
| 25 | T | InChI=1S/C2H6N2/c1-3-4-2/h1-2H3                       | -0.1 | 1.6  | 0.1  | -0.1 | -0.2 | -0.2 | -0.1 | -0.1 | -0.1 |
| 26 | T | InChI=1S/C2H6NO/c1-2-3-4/h3H,2H2,1H3                  | 1.1  | -0.4 | 0.8  | 1.6  | 1.7  | 1.5  | 0.9  | 0.6  | 0.2  |
| 27 | T | InChI=1S/C2H6NO/c1-2-3-4/h4H,2H2,1H3                  | 0.1  | 0.2  | -1.8 | -1.4 | -1.1 | -0.8 | -0.5 | -0.3 | -0.2 |
| 28 | T | InChI=1S/C2H6NO/c1-3(2)4/h1-2H3                       | -0.5 | 0.9  | 0.1  | -0.4 | -0.4 | -0.3 | 0.1  | 0.3  | 0.3  |
| 29 | T | InChI=1S/C2H7N/c1-2-3/h2-3H2,1H3                      | -0.1 | 1.2  | 0.1  | -0.1 | -0.1 | -0.1 | -0.1 | -0.1 | -0.1 |
| 30 | T | InChI=1S/C2H7N/c1-3-2/h3H,1-2H3                       | -1.7 | 1.0  | -0.6 | 0.0  | 0.3  | 0.3  | 0.2  | 0.1  | 0.1  |
| 31 | T | InChI=1S/C2H7NO/c1-2-3-4/h3-4H,2H2,1H3                | -0.9 | 2.7  | -3.7 | -3.5 | -2.9 | -2.2 | -1.3 | -0.7 | -0.3 |
| 32 | T | InChI=1S/C2H7NO/c1-3(2)4/h4H,1-2H3                    | 1.7  | 2.4  | -1.0 | -0.6 | -0.4 | -0.4 | -0.6 | -0.8 | -0.6 |
| 33 | T | InChI=1S/C2H8N2/c1-2(3)4/h2H,3-4H2,1H3                | -0.6 | 0.8  | -0.5 | -0.2 | -0.1 | 0.0  | 0.1  | 0.1  | 0.0  |
| 34 | T | InChI=1S/C2H8N2/c1-2-4-3/h4H,2-3H2,1H3                | 0.5  | -0.2 | -1.1 | -1.1 | -1.2 | -1.2 | -1.0 | -0.8 | -0.3 |
| 35 | T | InChI=1S/C2H8N2/c1-3-4-2/h3-4H,1-2H3                  | -0.8 | 2.1  | -0.9 | 0.1  | 0.9  | 1.4  | 1.4  | 1.1  | 0.2  |
| 36 | T | InChI=1S/C2H8N2/c1-4(2)3/h3H2,1-2H3                   | -0.8 | 1.0  | -0.9 | 0.1  | 0.7  | 0.9  | 0.8  | 0.6  | 0.0  |
| 37 | T | InChI=1S/C2H8N2/c1-4-2-3/h4H,2-3H2,1H3                | -1.3 | 3.1  | 0.3  | -0.2 | -0.5 | -0.7 | -0.8 | -0.7 | -0.4 |
| 38 | T | InChI=1S/C3H10N2/c1-2-3(4)5/h3H,2,4-5H2,1H3           | 0.2  | -1.4 | -0.9 | -0.6 | -0.2 | 0.0  | 0.3  | 0.3  | 0.2  |
| 39 | T | InChI=1S/C3H10N2/c1-3(2)5-4/h3,5H,4H2,1-2H3           | -0.6 | -1.6 | 1.7  | 0.8  | 0.4  | 0.3  | 0.2  | 0.2  | 0.3  |
| 40 | T | InChI=1S/C3H10N2/c1-3(4)5-2/h3,5H,4H2,1-2H3/t3-/m1/s1 | 0.4  | 0.6  | 1.4  | 0.8  | 0.3  | -0.1 | -0.3 | -0.4 | -0.2 |
| 41 | T | InChI=1S/C3H10N2/c1-3-5(2)4/h3-4H2,1-2H3              | 0.0  | 1.1  | 0.0  | 0.0  | 0.2  | 0.4  | 0.6  | 0.5  | 0.2  |

|    |   |                                             |      |      |      |      |      |      |      |      |      |
|----|---|---------------------------------------------|------|------|------|------|------|------|------|------|------|
| 42 | T | InChI=1S/C3H10N2/c1-5(2)3-4/h3-4H2,1-2H3    | 1.3  | -2.4 | 0.0  | 0.1  | 0.2  | 0.4  | 0.5  | 0.6  | 0.4  |
| 43 | T | InChI=1S/C3H3N/c1-2-3-4/h1,3-4H/b4-3+       | 2.8  | -5.6 | -2.6 | -2.4 | -2.4 | -2.4 | -2.5 | -2.6 | -2.7 |
| 44 | T | InChI=1S/C3H4N/c1-2-3-4/h2-3H,1H2           | 3.3  | 1.5  | 0.7  | 1.7  | 1.8  | 1.5  | 0.7  | 0.1  | -0.3 |
| 45 | T | InChI=1S/C3H4N/c1-2-3-4/h2H,1H3             | -0.7 | -0.4 | 1.9  | 1.2  | 0.9  | 0.8  | 0.7  | 0.7  | 0.6  |
| 46 | T | InChI=1S/C3H4N/c1-2-3-4/h4H,1H3             | 0.5  | 6.3  | 0.5  | 0.6  | 0.7  | 0.9  | 1.1  | 1.2  | 1.4  |
| 47 | T | InChI=1S/C3H4N/c1-3-4-2/h1H,2H3             | 0.7  | -1.0 | 1.4  | 1.3  | 1.1  | 1.0  | 0.8  | 0.7  | 0.5  |
| 48 | T | InChI=1S/C3H5N/c1-2-3-4/h2,4H,1H3           | 3.9  | 0.5  | 0.1  | 0.1  | 0.2  | 0.2  | 0.2  | 0.2  | 0.2  |
| 49 | T | InChI=1S/C3H5N/c1-2-3-4/h2-4H,1H2/b4-3-     | -1.2 | -0.8 | -0.6 | 0.8  | 1.6  | 1.9  | 1.9  | 1.6  | 1.0  |
| 50 | T | InChI=1S/C3H5N/c1-2-3-4/h2H2,1H3            | 0.4  | 1.2  | -1.1 | -1.4 | -1.3 | -1.1 | -0.7 | -0.5 | -0.2 |
| 51 | T | InChI=1S/C3H5N/c1-2-3-4/h4H2,1H3            | 2.5  | 5.1  | 1.2  | 1.0  | 1.0  | 1.0  | 1.1  | 1.2  | 1.3  |
| 52 | T | InChI=1S/C3H5N/c1-3-4-2/h1,4H,2H3           | 1.9  | 0.3  | 1.4  | 0.8  | 0.4  | 0.2  | 0.2  | 0.2  | 0.2  |
| 53 | T | InChI=1S/C3H5N/c1-3-4-2/h1H2,2H3            | 1.7  | -0.7 | -0.6 | -0.4 | -0.4 | -0.3 | -0.3 | -0.2 | -0.2 |
| 54 | T | InChI=1S/C3H5N/c1-3-4-2/h3H,1-2H2           | 0.8  | 5.8  | 2.0  | 1.2  | 0.4  | -0.1 | -0.3 | -0.3 | -0.1 |
| 55 | T | InChI=1S/C3H6N/c1-2-3-4/h2,4H,1,3H2         | 2.8  | 2.1  | -2.8 | -2.7 | -2.4 | -1.9 | -1.1 | -0.6 | -0.1 |
| 56 | T | InChI=1S/C3H6N/c1-2-3-4/h2-3H,1,4H2         | 1.9  | -4.8 | 3.0  | 3.0  | 2.6  | 2.2  | 1.4  | 0.8  | 0.0  |
| 57 | T | InChI=1S/C3H6N/c1-2-3-4/h2-4H,1H3           | -2.8 | -0.9 | -0.9 | -1.0 | -0.9 | -0.8 | -0.6 | -0.4 | -0.2 |
| 58 | T | InChI=1S/C3H6N/c1-2-3-4/h3-4H,1-2H2/b4-3+   | 0.2  | -2.7 | 4.0  | 3.0  | 2.4  | 2.0  | 1.4  | 1.1  | 0.7  |
| 59 | T | InChI=1S/C3H6N/c1-2-3-4/h4H,2H2,1H3         | -0.4 | 2.8  | -0.2 | -0.3 | -0.3 | -0.3 | -0.2 | -0.1 | 0.0  |
| 60 | T | InChI=1S/C3H6N/c1-3(2)4/h1-2H3              | 1.2  | 0.8  | 0.4  | -0.1 | -0.3 | -0.3 | -0.2 | -0.1 | -0.1 |
| 61 | T | InChI=1S/C3H6N/c1-3(2)4/h4H,1H2,2H3         | 0.8  | 7.3  | -0.2 | -0.3 | -0.2 | -0.1 | 0.2  | 0.4  | 0.3  |
| 62 | T | InChI=1S/C3H6N/c1-3-4-2/h1,3-4H,2H3         | 4.1  | 4.5  | 3.0  | 2.3  | 1.8  | 1.4  | 0.8  | 0.4  | -0.3 |
| 63 | T | InChI=1S/C3H6N/c1-3-4-2/h2H,3H2,1H3         | 1.5  | 6.4  | -0.2 | -1.0 | -1.3 | -1.3 | -1.1 | -1.0 | -0.6 |
| 64 | T | InChI=1S/C3H6N/c1-3-4-2/h3-4H,1-2H2         | -3.6 | 2.9  | -0.7 | -0.8 | -0.9 | -1.0 | -1.1 | -1.1 | -0.8 |
| 65 | T | InChI=1S/C3H6N/c1-3-4-2/h3H,1H2,2H3         | 2.5  | -1.6 | 1.0  | 1.1  | 0.9  | 0.7  | 0.2  | -0.1 | -0.4 |
| 66 | T | InChI=1S/C3H6N/c1-3-4-2/h3H,2H2,1H3         | -1.0 | -7.3 | 1.2  | 0.8  | 0.6  | 0.4  | 0.1  | 0.0  | 0.3  |
| 67 | T | InChI=1S/C3H6N/c1-3-4-2/h4H,1H2,2H3         | 1.6  | 3.0  | -2.9 | -4.0 | -4.6 | -4.8 | -4.3 | -3.4 | -1.9 |
| 68 | T | InChI=1S/C3H7N/c1-2-3-4/h2-3H,4H2,1H3/b3-2+ | 4.6  | 2.9  | 0.1  | -0.2 | -0.2 | -0.2 | -0.4 | -0.6 | -0.9 |
| 69 | T | InChI=1S/C3H7N/c1-2-3-4/h2H,1,3-4H2         | 1.1  | -2.2 | 0.7  | 1.5  | 1.5  | 1.3  | 0.9  | 0.6  | 0.3  |
| 70 | T | InChI=1S/C3H7N/c1-2-3-4/h3-4H,2H2,1H3/b4-3+ | -0.2 | 3.7  | -2.9 | -1.9 | -1.2 | -0.8 | -0.4 | -0.2 | 0.0  |
| 71 | T | InChI=1S/C3H7N/c1-3(2)4/h1,4H2,2H3          | -2.6 | 0.2  | -0.8 | -0.9 | -0.8 | -0.5 | -0.1 | 0.2  | 0.4  |
| 72 | T | InChI=1S/C3H7N/c1-3(2)4/h4H,1-2H3           | -1.2 | -0.8 | -0.4 | 0.1  | 0.3  | 0.3  | 0.2  | 0.1  | 0.1  |
| 73 | T | InChI=1S/C3H7N/c1-3-4-2/h2-3H2,1H3          | 1.3  | -1.5 | 1.3  | 1.1  | 0.8  | 0.6  | 0.4  | 0.3  | 0.0  |



|     |   |                                          |      |      |      |      |      |      |      |      |      |
|-----|---|------------------------------------------|------|------|------|------|------|------|------|------|------|
| 74  | T | InChI=1S/C3H7N/c1-3-4-2/h3-4H,1H2,2H3    | -1.8 | -2.6 | -1.1 | -1.2 | -1.6 | -1.9 | -2.2 | -2.1 | -0.9 |
| 75  | T | InChI=1S/C3H7N/c1-3-4-2/h3H,1-2H3/b4-3-  | 0.2  | -1.3 | 0.4  | 0.5  | 0.5  | 0.3  | 0.1  | -0.1 | -0.2 |
| 76  | T | InChI=1S/C3H7NO/c1-2-3(4)5/h2H2,1H3,4H2  | -1.2 | 6.9  | -1.4 | -3.6 | -5.0 | -5.3 | -4.7 | -3.7 | -1.8 |
| 77  | T | InChI=1S/C3H7NO/c1-2-3-4-5/h2-3H2,1H3    | 0.0  | 0.4  | -2.3 | -1.0 | -0.4 | -0.2 | -0.1 | 0.0  | 0.1  |
| 78  | T | InChI=1S/C3H7NO/c1-3(2)4-5/h3H,1-2H3     | -0.2 | -1.5 | -3.5 | -3.1 | -2.6 | -2.1 | -1.3 | -0.9 | -0.3 |
| 79  | T | InChI=1S/C3H7NO/c1-3(5)4-2/h1-2H3,4H1    | -1.7 | -1.7 | 1.4  | 0.5  | -0.1 | -0.4 | -0.6 | -0.6 | -0.5 |
| 80  | T | InChI=1S/C3H7NO/c1-4(2)3-5/h3H,1-2H3     | -4.2 | 2.3  | 0.3  | 0.0  | -0.2 | -0.3 | -0.4 | -0.4 | -0.3 |
| 81  | T | InChI=1S/C3H7NO2/c1-2-3-4(5)6/h2-3H2,1H3 | -0.4 | -0.2 | -3.9 | -2.3 | -1.4 | -0.8 | -0.2 | 0.1  | 0.6  |
| 82  | T | InChI=1S/C3H7NO2/c1-2-3-6-4-5/h2-3H2,1H3 | -0.1 | -4.1 | -2.8 | -1.5 | -0.9 | -0.6 | -0.4 | -0.3 | -0.1 |
| 83  | T | InChI=1S/C3H7NO2/c1-3(2)4(5)6/h3H,1-2H3  | 2.6  | 5.7  | -2.5 | -2.4 | -2.3 | -2.1 | -1.7 | -1.2 | -0.5 |
| 84  | T | InChI=1S/C3H7NO2/c1-3(2)6-4-5/h3H,1-2H3  | 2.2  | 4.3  | -2.6 | -3.5 | -4.3 | -4.7 | -4.6 | -4.1 | -3.0 |
| 85  | T | InChI=1S/C3H8N/c1-2-3-4/h1-4H2           | -3.3 | -0.7 | -1.8 | -0.8 | -0.2 | 0.1  | 0.2  | 0.1  | 0.1  |
| 86  | T | InChI=1S/C3H8N/c1-2-3-4/h2H,3-4H2,1H3    | -0.2 | -2.6 | 1.7  | 1.7  | 1.5  | 1.3  | 0.9  | 0.6  | 0.3  |
| 87  | T | InChI=1S/C3H8N/c1-2-3-4/h3H,2,4H2,1H3    | 1.0  | -1.5 | -3.2 | -2.0 | -1.2 | -0.7 | -0.4 | -0.2 | -0.1 |
| 88  | T | InChI=1S/C3H8N/c1-2-3-4/h4H,2-3H2,1H3    | 2.0  | 1.0  | -1.8 | -0.9 | -0.5 | -0.3 | -0.2 | -0.2 | -0.1 |
| 89  | T | InChI=1S/C3H8N/c1-3(2)4/h3-4H,1-2H3      | -0.1 | 3.4  | 0.1  | 0.0  | -0.3 | -0.5 | -0.7 | -0.6 | -0.4 |
| 90  | T | InChI=1S/C3H8N/c1-3(2)4/h4H2,1-2H3       | -3.6 | -0.1 | 3.5  | 2.3  | 1.4  | 0.8  | 0.3  | 0.1  | 0.0  |
| 91  | T | InChI=1S/C3H8N/c1-3-4-2/h3H2,1-2H3       | 0.0  | -4.5 | 0.3  | 0.1  | 0.0  | -0.1 | -0.1 | -0.1 | -0.1 |
| 92  | T | InChI=1S/C3H8N/c1-3-4-2/h4H,1,3H2,2H3    | -1.7 | -4.7 | 4.6  | 3.4  | 2.5  | 1.9  | 1.2  | 0.9  | 0.6  |
| 93  | T | InChI=1S/C3H8N/c1-3-4-2/h4H,2-3H2,1H3    | 1.2  | 4.0  | -1.4 | -1.3 | -1.3 | -1.3 | -1.1 | -1.0 | -0.7 |
| 94  | T | InChI=1S/C3H8N2/c1-2-3(4)5/h2-3H,1,4-5H2 | 3.4  | 5.2  | -1.2 | -4.6 | -6.8 | -7.5 | -6.7 | -5.0 | -2.4 |
| 95  | T | InChI=1S/C3H8N2/c1-3(4)5-2/h5H,1,4H2,2H3 | -0.5 | -0.8 | -2.0 | -1.8 | -0.8 | 0.5  | 1.9  | 2.1  | 1.0  |
| 96  | T | InChI=1S/C3H8N2/c1-3-5-4-2/h3H2,1-2H3    | 0.1  | -0.7 | 0.6  | 0.0  | -0.2 | -0.3 | -0.2 | -0.2 | -0.1 |
| 97  | T | InChI=1S/C3H8NO/c1-3(2)4-5/h3,5H,1-2H3   | 1.3  | 1.2  | 0.8  | 0.6  | 0.3  | 0.0  | -0.3 | -0.4 | -0.4 |
| 98  | T | InChI=1S/C3H8NO/c1-3(2)4-5/h3-4H,1-2H3   | 0.2  | 0.3  | 1.4  | 1.2  | 0.7  | 0.2  | -0.3 | -0.5 | -0.4 |
| 99  | T | InChI=1S/C3H8NO/c1-3-4(2)5/h3H2,1-2H3    | -1.1 | 1.8  | -1.9 | -2.2 | -2.0 | -1.6 | -1.0 | -0.6 | -0.2 |
| 100 | T | InChI=1S/C3H9N/c1-2-3-4/h2-4H2,1H3       | 0.7  | 2.1  | -1.6 | -1.1 | -0.7 | -0.5 | -0.4 | -0.4 | -0.3 |
| 101 | T | InChI=1S/C3H9N/c1-3(2)4/h3H,4H2,1-2H3    | -3.4 | 2.6  | -0.5 | -0.3 | -0.2 | -0.2 | -0.2 | -0.2 | 0.0  |
| 102 | T | InChI=1S/C3H9N/c1-3-4-2/h4H,3H2,1-2H3    | -1.4 | -0.2 | 0.6  | 0.3  | 0.1  | -0.1 | -0.2 | -0.2 | 0.0  |
| 103 | T | InChI=1S/C3H9N/c1-4(2)3/h1-3H3           | -0.2 | 0.4  | 1.1  | 0.4  | 0.1  | 0.0  | -0.1 | -0.1 | -0.1 |
| 104 | T | InChI=1S/C3H9NO/c1-3(2)4-5/h3-5H,1-2H3   | -2.2 | 1.6  | -2.0 | -2.7 | -2.5 | -1.9 | -1.0 | -0.5 | -0.1 |
| 105 | T | InChI=1S/C3H9NO/c1-3-4(2)5/h5H,3H2,1-2H3 | 0.9  | -1.0 | 1.8  | 2.0  | 1.7  | 1.4  | 0.8  | 0.4  | 0.1  |

|     |   |                                                           |      |      |      |      |      |      |      |      |      |
|-----|---|-----------------------------------------------------------|------|------|------|------|------|------|------|------|------|
| 106 | T | InChI=1S/C4H10N/c1-2-3-4-5/h2H,3-5H2,1H3                  | -1.7 | -2.4 | -2.4 | -0.9 | 0.0  | 0.4  | 0.6  | 0.4  | 0.2  |
| 107 | T | InChI=1S/C4H10N/c1-2-3-4-5/h3H,2,4-5H2,1H3                | 1.6  | 0.8  | -4.5 | -2.1 | -1.0 | -0.6 | -0.5 | -0.6 | -0.6 |
| 108 | T | InChI=1S/C4H10N/c1-2-3-4-5/h4H,2-3,5H2,1H3                | 1.4  | -2.8 | -3.8 | -1.9 | -0.7 | -0.1 | 0.4  | 0.6  | 0.5  |
| 109 | T | InChI=1S/C4H10N/c1-3-4(2)5/h3,5H2,1-2H3                   | -4.4 | 0.1  | -0.9 | -0.1 | 0.3  | 0.6  | 0.7  | 0.7  | 0.5  |
| 110 | T | InChI=1S/C4H10N/c1-3-5-4-2/h3,5H,4H2,1-2H3                | -3.0 | 4.4  | 4.2  | 0.9  | -0.6 | -1.2 | -1.5 | -1.4 | -0.9 |
| 111 | T | InChI=1S/C4H10N/c1-3-5-4-2/h3-4H2,1-2H3                   | 0.1  | 1.8  | 1.2  | 1.3  | 1.1  | 0.9  | 0.5  | 0.3  | 0.0  |
| 112 | T | InChI=1S/C4H10N/c1-3-5-4-2/h5H,1,3-4H2,2H3                | -1.7 | -3.5 | 5.4  | 3.1  | 1.7  | 1.0  | 0.5  | 0.4  | 0.4  |
| 113 | T | InChI=1S/C4H10N/c1-4(2)3-5/h4-5H,3H2,1-2H3                | -2.6 | -4.1 | 2.0  | 1.5  | 1.4  | 1.2  | 0.9  | 0.6  | 0.0  |
| 114 | T | InChI=1S/C4H10N2/c1-3-4(5)6-2/h3-4,6H,1,5H2,2H3/t4-/m1/s1 | -1.3 | -3.1 | 1.6  | 3.9  | 4.7  | 4.5  | 3.3  | 2.2  | 0.9  |
| 115 | T | InChI=1S/C4H10N2/c1-3-5-6-4-2/h3-4H2,1-2H3                | 0.0  | 0.5  | 1.1  | 0.2  | -0.2 | -0.3 | -0.3 | -0.2 | 0.0  |
| 116 | T | InChI=1S/C4H11N/c1-2-3-4-5/h2-5H2,1H3                     | 1.6  | -0.6 | -2.3 | -1.7 | -1.3 | -1.0 | -0.7 | -0.5 | -0.3 |
| 117 | T | InChI=1S/C4H11N/c1-3-4(2)5/h4H,3,5H2,1-2H3/t4-/m1/s1      | 0.4  | 0.1  | 0.1  | 0.2  | 0.2  | 0.2  | 0.1  | 0.0  | 0.0  |
| 118 | T | InChI=1S/C4H11N/c1-3-5-4-2/h5H,3-4H2,1-2H3                | 2.4  | -0.7 | 2.0  | 0.9  | 0.2  | -0.2 | -0.4 | -0.3 | -0.1 |
| 119 | T | InChI=1S/C4H11N/c1-4(2)3-5/h4H,3,5H2,1-2H3                | 1.3  | -0.6 | -0.7 | -1.3 | -1.1 | -0.9 | -0.5 | -0.4 | -0.4 |
| 120 | T | InChI=1S/C4H11N/c1-4(2)5-3/h4-5H,1-3H3                    | -1.3 | 0.7  | -0.5 | -0.6 | -0.7 | -0.7 | -0.7 | -0.5 | -0.2 |
| 121 | T | InChI=1S/C4H11N/c1-4(2,3)5/h5H2,1-3H3                     | -3.7 | 2.1  | 2.1  | 1.7  | 1.4  | 1.2  | 0.9  | 0.7  | 0.4  |
| 122 | T | InChI=1S/C4H11N/c1-4-5(2)3/h4H2,1-3H3                     | -1.7 | 3.0  | -1.6 | -0.7 | -0.5 | -0.5 | -0.6 | -0.6 | -0.5 |
| 123 | T | InChI=1S/C4H11NO/c1-3-5(6)4-2/h6H,3-4H2,1-2H3             | 0.5  | -5.8 | 4.9  | 4.8  | 3.9  | 3.2  | 2.2  | 1.6  | 1.0  |
| 124 | T | InChI=1S/C4H12N2/c1-4-6(3)5-2/h5H,4H2,1-3H3               | 0.8  | -2.1 | 0.9  | -0.1 | -0.9 | -1.4 | -1.4 | -1.1 | -0.2 |
| 125 | T | InChI=1S/C4H3N/c1-2-3-4-5/h1H3                            | 0.9  | 0.0  | -0.2 | -0.1 | 0.0  | 0.1  | 0.2  | 0.2  | 0.1  |
| 126 | T | InChI=1S/C4H4N/c1-2-3-4-5/h2-3H,1H2                       | 4.4  | -3.3 | 2.7  | 3.0  | 2.7  | 2.2  | 1.5  | 1.1  | 0.5  |
| 127 | T | InChI=1S/C4H4N/c1-3-5-4-2/h1,4H,2H2                       | -0.1 | -7.5 | -4.7 | -4.2 | -3.9 | -3.9 | -3.9 | -3.9 | -3.9 |
| 128 | T | InChI=1S/C4H5N/c1-2-3-4-5/h2-3H,1H3/b3-2+                 | 5.7  | -0.8 | 1.9  | 2.0  | 1.8  | 1.4  | 1.0  | 0.7  | 0.4  |
| 129 | T | InChI=1S/C4H5N/c1-2-3-4-5/h2H,1,3H2                       | 2.4  | -0.3 | 0.8  | 0.9  | 0.8  | 0.6  | 0.4  | 0.3  | 0.2  |
| 130 | T | InChI=1S/C4H5N/c1-2-3-4-5/h4-5H,1H3/b5-4+                 | -2.2 | 0.4  | 2.3  | 1.9  | 1.7  | 1.6  | 1.5  | 1.5  | 1.5  |
| 131 | T | InChI=1S/C4H5N/c1-3-5-4-2/h1,4-5H,2H2                     | -1.0 | 2.1  | 1.0  | 0.7  | 0.5  | 0.3  | 0.0  | -0.1 | -0.2 |
| 132 | T | InChI=1S/C4H5N/c1-4(2)3-5/h1H2,2H3                        | 2.2  | 1.4  | -0.4 | -0.4 | -0.3 | -0.3 | -0.2 | -0.2 | -0.1 |
| 133 | T | InChI=1S/C4H6N/c1-2-3-4-5/h3H,2H2,1H3                     | -0.3 | 0.6  | -1.7 | -0.8 | -0.3 | -0.1 | 0.0  | 0.0  | 0.1  |
| 134 | T | InChI=1S/C4H6N/c1-3-4-5-2/h3H,2H2,1H3                     | 1.3  | -1.2 | 0.9  | 1.0  | 0.9  | 0.7  | 0.4  | 0.1  | -0.3 |
| 135 | T | InChI=1S/C4H6N/c1-3-5-4-2/h1H,4H2,2H3                     | -0.1 | 0.9  | -2.4 | -1.7 | -1.2 | -0.9 | -0.5 | -0.4 | -0.2 |
| 136 | T | InChI=1S/C4H6N/c1-3-5-4-2/h3-4H,1-2H2                     | -4.2 | -1.3 | -3.6 | -2.5 | -0.7 | 0.6  | 1.7  | 1.8  | 1.4  |
| 137 | T | InChI=1S/C4H6N/c1-3-5-4-2/h4H,1H2,2H3                     | -4.1 | -1.6 | 1.3  | 1.1  | 0.9  | 0.7  | 0.6  | 0.5  | 0.5  |

|     |   |                                                     |      |      |      |      |      |      |      |      |      |
|-----|---|-----------------------------------------------------|------|------|------|------|------|------|------|------|------|
| 138 | T | InChI=1S/C4H6N/c1-4(2)3-5/h1-2H3                    | -0.2 | 2.5  | -0.8 | -0.7 | -0.6 | -0.4 | -0.1 | 0.0  | 0.2  |
| 139 | T | InChI=1S/C4H7N/c1-2-3-4-5/h2,5H2,1H3                | 0.7  | -5.7 | 1.1  | 1.2  | 1.2  | 1.3  | 1.4  | 1.4  | 1.4  |
| 140 | T | InChI=1S/C4H7N/c1-2-3-4-5/h2-3H2,1H3                | -2.5 | -0.5 | -2.6 | -1.8 | -1.1 | -0.6 | -0.3 | -0.2 | -0.2 |
| 141 | T | InChI=1S/C4H7N/c1-2-3-4-5/h2-5H,1H3/b3-2+,5-4-      | 4.0  | 0.3  | 0.0  | -0.2 | -0.6 | -1.0 | -1.1 | -1.0 | -0.7 |
| 142 | T | InChI=1S/C4H7N/c1-3-4-5-2/h3-4H,1H2,2H3/b5-4-       | -2.3 | -4.0 | 1.1  | 2.2  | 2.6  | 2.7  | 2.4  | 2.0  | 1.2  |
| 143 | T | InChI=1S/C4H7N/c1-3-4-5-2/h3-4H,2H2,1H3/b4-3+       | -0.4 | -5.1 | -3.3 | -1.7 | -0.1 | 0.9  | 1.6  | 1.4  | 0.8  |
| 144 | T | InChI=1S/C4H7N/c1-3-5-4-2/h1,4H2,2H3                | 0.9  | 3.0  | -1.4 | -2.0 | -2.1 | -2.0 | -1.6 | -1.2 | -0.7 |
| 145 | T | InChI=1S/C4H7N/c1-3-5-4-2/h1,5H,4H2,2H3             | 0.6  | 4.4  | -1.4 | -0.9 | -0.6 | -0.4 | -0.2 | -0.2 | -0.2 |
| 146 | T | InChI=1S/C4H7N/c1-3-5-4-2/h3-4H,1H2,2H3/b5-4-       | -0.4 | -0.7 | 1.2  | 0.5  | -0.3 | -0.9 | -1.2 | -1.2 | -0.7 |
| 147 | T | InChI=1S/C4H7N/c1-3-5-4-2/h3-5H,1-2H2               | -4.7 | 1.7  | 3.1  | 3.1  | 2.6  | 2.3  | 2.2  | 2.3  | 2.3  |
| 148 | T | InChI=1S/C4H7N/c1-4(2)3-5/h4H,1-2H3                 | 2.0  | 4.3  | -1.4 | -1.3 | -1.2 | -1.0 | -0.8 | -0.6 | -0.2 |
| 149 | T | InChI=1S/C4H7N/c1-4(2)5-3/h1,3H2,2H3                | 1.9  | -0.6 | -1.5 | -0.8 | -0.3 | -0.1 | 0.2  | 0.3  | 0.2  |
| 150 | T | InChI=1S/C4H8N/c1-3-4(2)5/h3H,1,5H2,2H3             | -2.2 | -2.5 | 2.4  | 2.6  | 2.5  | 2.4  | 2.0  | 1.8  | 1.2  |
| 151 | T | InChI=1S/C4H8N/c1-3-4-5-2/h3-5H,1H2,2H3             | -4.2 | 1.4  | -1.6 | -1.9 | -2.1 | -2.1 | -1.8 | -1.3 | -0.1 |
| 152 | T | InChI=1S/C4H8N/c1-3-4-5-2/h4H,2-3H2,1H3             | -0.6 | 5.0  | -1.4 | -0.6 | -0.3 | 0.0  | 0.2  | 0.3  | 0.2  |
| 153 | T | InChI=1S/C4H8N/c1-3-5-4-2/h5H,1,4H2,2H3             | 1.3  | -4.2 | -1.7 | -0.1 | 0.6  | 0.7  | 0.3  | -0.1 | -0.4 |
| 154 | T | InChI=1S/C4H8N/c1-4(2)3-5/h3,5H,1-2H3               | 1.2  | 3.4  | 0.9  | 0.5  | 0.2  | 0.0  | -0.1 | -0.1 | 0.0  |
| 155 | T | InChI=1S/C4H8N/c1-4(2)3-5/h3H,1,5H2,2H3             | 2.3  | 3.4  | -1.3 | -1.1 | -0.6 | -0.1 | 0.4  | 0.5  | 0.1  |
| 156 | T | InChI=1S/C4H8N/c1-4(2)3-5/h4-5H,1-2H3               | 0.8  | -2.3 | -0.6 | -0.3 | -0.2 | -0.1 | 0.0  | 0.1  | 0.1  |
| 157 | T | InChI=1S/C4H8N/c1-4(2)5-3/h1H2,2-3H3                | -1.6 | -0.5 | -1.8 | -1.6 | -1.5 | -1.4 | -1.2 | -1.0 | -0.7 |
| 158 | T | InChI=1S/C4H8N/c1-4(2)5-3/h3H2,1-2H3                | -1.6 | 6.1  | 0.5  | 0.0  | -0.8 | -1.6 | -2.4 | -2.5 | -1.3 |
| 159 | T | InChI=1S/C4H8N/c1-4-5(2)3/h1H2,2-3H3                | -1.7 | 3.3  | -0.2 | -0.3 | 0.2  | 0.9  | 1.7  | 1.7  | 0.9  |
| 160 | T | InChI=1S/C4H9N/c1-2-3-4-5/h2-3H,4-5H2,1H3/b3-2+     | 0.1  | 4.8  | -0.8 | -0.7 | -0.7 | -0.7 | -0.6 | -0.5 | -0.3 |
| 161 | T | InChI=1S/C4H9N/c1-2-3-4-5/h3-4H,2,5H2,1H3/b4-3+     | 3.3  | -1.6 | 1.2  | 1.2  | 1.3  | 1.3  | 1.1  | 0.8  | 0.1  |
| 162 | T | InChI=1S/C4H9N/c1-3-4(2)5/h2-3,5H2,1H3              | -1.9 | -2.5 | -1.1 | -0.9 | -0.4 | 0.1  | 0.7  | 0.9  | 0.7  |
| 163 | T | InChI=1S/C4H9N/c1-3-4(2)5/h3-4H,1,5H2,2H3/t4-/m0/s1 | -0.6 | -2.2 | 2.6  | 2.6  | 2.1  | 1.6  | 0.9  | 0.5  | 0.3  |
| 164 | T | InChI=1S/C4H9N/c1-3-4-5-2/h3,5H,1,4H2,2H3           | -0.3 | -3.3 | -1.0 | 0.2  | 0.7  | 0.8  | 0.7  | 0.5  | 0.3  |
| 165 | T | InChI=1S/C4H9N/c1-3-4-5-2/h4H,3H2,1-2H3/b5-4-       | 0.0  | -0.8 | -1.0 | -0.8 | -0.7 | -0.6 | -0.4 | -0.3 | -0.1 |
| 166 | T | InChI=1S/C4H9N/c1-3-5-4-2/h3,5H,1,4H2,2H3           | -0.4 | 4.3  | 0.2  | -0.7 | -1.0 | -1.0 | -0.6 | -0.1 | 0.4  |
| 167 | T | InChI=1S/C4H9N/c1-3-5-4-2/h3H,4H2,1-2H3/b5-3-       | 0.2  | -0.6 | 0.6  | 0.8  | 0.7  | 0.4  | 0.0  | -0.2 | -0.3 |
| 168 | T | InChI=1S/C4H9N/c1-4(2)3-5/h1,3,5H2,2H3              | -1.1 | 5.8  | 0.1  | -2.7 | -3.3 | -3.1 | -2.2 | -1.5 | -0.7 |
| 169 | T | InChI=1S/C4H9N/c1-4(2)3-5/h3-5H,1-2H3/b5-3+         | 0.4  | 2.5  | -1.5 | -1.4 | -1.2 | -1.1 | -0.8 | -0.6 | -0.3 |

|     |   |                                                         |      |      |      |      |      |      |      |      |      |
|-----|---|---------------------------------------------------------|------|------|------|------|------|------|------|------|------|
| 170 | T | InChI=1S/C4H9N/c1-4(2)3-5/h3H,5H2,1-2H3                 | -2.1 | 2.4  | -0.5 | -0.7 | -1.0 | -1.1 | -1.0 | -0.8 | -0.3 |
| 171 | T | InChI=1S/C4H9N/c1-4(2)5-3/h1-3H3                        | 1.9  | -0.2 | -0.8 | -0.1 | 0.0  | -0.1 | -0.4 | -0.6 | -0.6 |
| 172 | T | InChI=1S/C4H9N/c1-4(2)5-3/h5H,1H2,2-3H3                 | -2.8 | -2.9 | 1.9  | 2.5  | 2.4  | 2.2  | 1.8  | 1.5  | 0.9  |
| 173 | T | InChI=1S/C4H9N/c1-4-5(2)3/h4H,1H2,2-3H3                 | -2.0 | 7.9  | -0.8 | -1.2 | -1.4 | -1.2 | -0.7 | -0.2 | 0.1  |
| 174 | T | InChI=1S/C4H9NO/c1-2-3-4(5)6/h2-3H2,1H3,5H2             | -1.5 | 2.3  | -1.9 | -2.5 | -3.1 | -3.3 | -2.9 | -2.3 | -1.0 |
| 175 | T | InChI=1S/C4H9NO/c1-3(2)4(5)6/h3H,1-2H3,5H2              | 0.7  | -4.1 | 3.2  | 3.5  | 3.7  | 3.6  | 2.9  | 2.1  | 1.0  |
| 176 | T | InChI=1S/C4H9NO/c1-3-4(2)5-6/h4H,3H2,1-2H3/t4-/m1/s1    | 0.2  | 4.5  | -1.0 | -1.1 | -0.8 | -0.6 | -0.3 | -0.2 | -0.1 |
| 177 | T | InChI=1S/C4H9NO/c1-3-5-4(2)6/h3H2,1-2H3,5H1             | -2.4 | 4.0  | -1.2 | -0.5 | -0.1 | 0.1  | 0.2  | 0.2  | 0.2  |
| 178 | T | InChI=1S/C4H9NO/c1-4(2)3-5-6/h4H,3H2,1-2H3              | 0.9  | -3.7 | -0.2 | -0.1 | 0.0  | 0.1  | 0.2  | 0.1  | -0.1 |
| 179 | T | InChI=1S/C4H9NO/c1-4(6)5(2)3/h1-3H3                     | 1.0  | 6.8  | -0.3 | -1.8 | -2.5 | -2.7 | -2.6 | -2.3 | -1.7 |
| 180 | T | InChI=1S/C4H9NO2/c1-2-3-4-5(6)7/h2-4H2,1H3              | -0.4 | -2.4 | -3.5 | -2.1 | -1.2 | -0.8 | -0.3 | 0.0  | 0.5  |
| 181 | T | InChI=1S/C4H9NO2/c1-3-4(2)5(6)7/h4H,3H2,1-2H3/t4-/m1/s1 | 0.1  | 0.5  | 0.4  | 0.2  | 0.0  | -0.2 | -0.3 | -0.3 | -0.2 |
| 182 | T | InChI=1S/C4H9NO2/c1-3-4(2)7-5-6/h4H,3H2,1-2H3/t4-/m1/s1 | 0.7  | 1.5  | -2.0 | -2.3 | -2.7 | -2.9 | -2.9 | -2.8 | -2.4 |
| 183 | T | InChI=1S/C4H9NO2/c1-4(2)3-5(6)7/h4H,3H2,1-2H3           | -1.0 | -0.2 | -0.9 | -1.2 | -1.0 | -0.8 | -0.4 | -0.3 | -0.1 |
| 184 | T | InChI=1S/C4H9NO2/c1-4(2)3-7-5-6/h4H,3H2,1-2H3           | 0.2  | -4.1 | -0.2 | -0.4 | -0.2 | -0.1 | 0.1  | 0.1  | 0.0  |
| 185 | T | InChI=1S/C5H10N/c1-3-4-5(2)6/h3-4H,6H2,1-2H3            | 0.3  | -1.3 | 0.1  | 0.2  | 0.5  | 0.7  | 1.0  | 1.0  | 0.7  |
| 186 | T | InChI=1S/C5H10N/c1-3-5(2)4-6/h4,6H,3H2,1-2H3            | -0.9 | -0.3 | 0.6  | 1.7  | 2.1  | 2.1  | 1.8  | 1.5  | 0.9  |
| 187 | T | InChI=1S/C5H10N/c1-4-5(2)6-3/h4,6H,1H2,2-3H3            | 1.9  | 3.8  | -2.6 | -2.8 | -3.0 | -3.1 | -3.0 | -2.7 | -1.9 |
| 188 | T | InChI=1S/C5H10N/c1-4-6-5(2)3/h2,4H2,1,3H3               | -0.8 | 2.2  | 0.8  | 0.5  | 0.6  | 0.7  | 1.0  | 1.1  | 1.1  |
| 189 | T | InChI=1S/C5H10N/c1-4-6-5(2)3/h4H,1-3H3                  | 1.6  | -6.1 | -0.5 | 0.0  | 0.8  | 1.6  | 2.4  | 2.5  | 1.3  |
| 190 | T | InChI=1S/C5H10N/c1-5(2)4-6-3/h4H,1-3H3                  | -0.5 | 0.5  | 1.0  | -0.3 | -0.7 | -0.7 | -0.6 | -0.4 | -0.1 |
| 191 | T | InChI=1S/C5H11N/c1-2-3-4-5-6/h3-4H,2,5-6H2,1H3/b4-3+    | -0.5 | -0.4 | 3.0  | 2.8  | 2.2  | 1.7  | 1.0  | 0.6  | 0.3  |
| 192 | T | InChI=1S/C5H11N/c1-3-4-5-6-2/h3-4,6H,5H2,1-2H3/b4-3+    | -1.5 | -3.3 | 0.3  | 0.8  | 0.9  | 0.9  | 0.6  | 0.4  | 0.2  |
| 193 | T | InChI=1S/C5H11N/c1-3-5(2)4-6/h4-6H,3H2,1-2H3            | -4.1 | 0.5  | 2.9  | 2.8  | 2.5  | 2.2  | 1.5  | 1.1  | 0.6  |
| 194 | T | InChI=1S/C5H11N/c1-3-5(2)4-6/h4H,3,6H2,1-2H3/b5-4-      | -2.2 | -2.0 | 0.1  | -0.2 | -0.4 | -0.4 | -0.3 | -0.1 | 0.1  |
| 195 | T | InChI=1S/C5H11N/c1-3-5-6-4-2/h3,6H,1,4-5H2,2H3          | -0.4 | -2.7 | 0.7  | 0.8  | 0.7  | 0.6  | 0.4  | 0.3  | 0.2  |
| 196 | T | InChI=1S/C5H11N/c1-4(2)5(3)6/h5H,1,6H2,2-3H3/t5-/m1/s1  | -1.1 | 3.3  | -1.7 | -1.6 | -1.3 | -1.0 | -0.6 | -0.5 | -0.4 |
| 197 | T | InChI=1S/C5H11N/c1-4-5(2)6-3/h4-6H,1H2,2-3H3/t5-/m0/s1  | 1.7  | -1.1 | -0.9 | -0.9 | -0.8 | -0.6 | -0.3 | -0.1 | 0.1  |
| 198 | T | InChI=1S/C5H11N/c1-4-5(2)6-3/h4H2,1-3H3/b6-5+           | -0.2 | -1.9 | 0.6  | 0.3  | 0.1  | 0.0  | -0.1 | -0.2 | -0.2 |
| 199 | T | InChI=1S/C5H11N/c1-4-5(2,3)6/h4H,1,6H2,2-3H3            | -1.4 | 0.4  | -0.5 | -0.5 | -0.5 | -0.4 | -0.3 | -0.2 | 0.0  |
| 200 | T | InChI=1S/C5H11N/c1-4-6(3)5-2/h4H,1,5H2,2-3H3            | 0.1  | -4.9 | 0.8  | 0.6  | 0.2  | -0.2 | -0.7 | -0.9 | -0.5 |
| 201 | T | InChI=1S/C5H11N/c1-4-6-5(2)3/h4H2,1-3H3                 | -1.7 | 2.2  | 0.1  | -0.2 | -0.1 | 0.1  | 0.5  | 0.8  | 0.9  |

|     |   |                                                          |      |      |      |      |      |      |      |      |      |
|-----|---|----------------------------------------------------------|------|------|------|------|------|------|------|------|------|
| 202 | T | InChI=1S/C5H11N/c1-4-6-5(2)3/h6H,2,4H2,1,3H3             | -2.1 | -3.8 | 3.0  | 3.0  | 2.7  | 2.4  | 2.1  | 2.0  | 1.7  |
| 203 | T | InChI=1S/C5H11N/c1-5(2)4-6-3/h4,6H,1-3H3                 | 4.3  | -0.4 | 0.4  | 1.0  | 1.4  | 1.5  | 1.3  | 0.9  | 0.2  |
| 204 | T | InChI=1S/C5H11NO/c1-3-5(4-2)6-7/h5H,3-4H2,1-2H3          | 0.0  | -3.0 | 4.5  | 4.2  | 3.4  | 2.7  | 1.7  | 1.1  | 0.4  |
| 205 | T | InChI=1S/C5H11NO/c1-4-5(7)6(2)3/h4H2,1-3H3               | 1.9  | -0.7 | 0.2  | -0.8 | -1.3 | -1.4 | -1.0 | -0.7 | -0.1 |
| 206 | T | InChI=1S/C5H11NO/c1-5(2,3)4(6)7/h1-3H3,6H2               | 2.3  | -3.2 | -0.1 | 1.6  | 2.9  | 3.5  | 3.6  | 3.2  | 1.9  |
| 207 | T | InChI=1S/C5H11NO2/c1-3-5(4-2)6(7)8/h5H,3-4H2,1-2H3       | -2.7 | -6.2 | 2.1  | 2.3  | 2.4  | 2.3  | 2.0  | 1.5  | 0.7  |
| 208 | T | InChI=1S/C5H11NO2/c1-5(2,3)4-6(7)8/h4H2,1-3H3            | -1.0 | 5.8  | 1.8  | 0.3  | -0.3 | -0.5 | -0.6 | -0.5 | -0.5 |
| 209 | T | InChI=1S/C5H12N/c1-4-5(2)6-3/h6H,4H2,1-3H3               | 4.4  | -1.7 | -0.7 | -0.7 | -0.3 | 0.1  | 0.4  | 0.5  | 0.5  |
| 210 | T | InChI=1S/C5H12N2/c1-3-5-7-6-4-2/h3-5H2,1-2H3             | -0.1 | 1.1  | -1.0 | -0.4 | 0.0  | 0.1  | 0.2  | 0.1  | 0.0  |
| 211 | T | InChI=1S/C5H13N/c1-2-3-4-5-6/h2-6H2,1H3                  | 2.3  | -3.0 | -2.0 | -1.8 | -1.4 | -1.1 | -0.8 | -0.6 | -0.3 |
| 212 | T | InChI=1S/C5H13N/c1-3-4-5(2)6/h5H,3-4,6H2,1-2H3/t5-/m1/s1 | -1.0 | -2.4 | -0.3 | 0.5  | 0.6  | 0.5  | 0.3  | 0.2  | 0.2  |
| 213 | T | InChI=1S/C5H13N/c1-3-5(6)4-2/h5H,3-4,6H2,1-2H3           | 1.9  | -2.6 | 1.5  | 0.8  | 0.5  | 0.3  | 0.1  | 0.0  | 0.0  |
| 214 | T | InChI=1S/C5H13N/c1-4-5(2,3)6/h4,6H2,1-3H3                | 0.3  | -0.4 | -0.5 | -0.3 | -0.1 | 0.1  | 0.3  | 0.3  | 0.2  |
| 215 | T | InChI=1S/C5H13N/c1-4-6-5(2)3/h5-6H,4H2,1-3H3             | -1.0 | 1.3  | -0.6 | -0.3 | -0.3 | -0.4 | -0.2 | 0.0  | 0.3  |
| 216 | T | InChI=1S/C5H13N/c1-5(2,3)6-4/h6H,1-4H3                   | 3.4  | -1.6 | -1.6 | -1.4 | -1.4 | -1.3 | -1.2 | -1.0 | -0.6 |
| 217 | T | InChI=1S/C5H4N/c1-3-5-6-4-2/h2H,1H3                      | 0.3  | -5.9 | -1.8 | -1.6 | -1.6 | -1.7 | -1.8 | -1.9 | -2.1 |
| 218 | T | InChI=1S/C5H6N/c1-2-3-4-5-6/h2-4H,1H3                    | -0.9 | -0.1 | 1.4  | 1.4  | 1.2  | 1.0  | 0.6  | 0.5  | 0.3  |
| 219 | T | InChI=1S/C5H6N/c1-3-5(2)4-6/h3H,2H2,1H3                  | 3.4  | -1.2 | 0.8  | 1.0  | 0.9  | 0.8  | 0.7  | 0.5  | 0.4  |
| 220 | T | InChI=1S/C5H6N/c1-3-5-6-4-2/h4H,2H2,1H3                  | 1.1  | -0.3 | -1.1 | -0.9 | -0.7 | -0.4 | -0.1 | 0.0  | 0.1  |
| 221 | T | InChI=1S/C5H6N/c1-4-6-5(2)3/h1H,2H2,3H3                  | -1.1 | 7.9  | 5.7  | 5.1  | 4.6  | 4.3  | 4.0  | 3.8  | 3.8  |
| 222 | T | InChI=1S/C5H7N/c1-2-3-4-5-6/h2-3H,4H2,1H3/b3-2+          | -0.6 | 0.6  | 1.0  | 1.0  | 0.8  | 0.6  | 0.4  | 0.2  | 0.1  |
| 223 | T | InChI=1S/C5H7N/c1-3-4-5-6-2/h5H,1-2H3/b6-5+              | -0.6 | 5.2  | 0.3  | 0.5  | 0.7  | 0.8  | 1.0  | 1.1  | 1.2  |
| 224 | T | InChI=1S/C5H7N/c1-3-5(2)4-6/h2-3H2,1H3                   | -0.5 | -0.8 | 0.3  | 0.5  | 0.5  | 0.5  | 0.4  | 0.3  | 0.1  |
| 225 | T | InChI=1S/C5H7N/c1-3-5(2)4-6/h3H,1-2H3/b5-3-              | -5.1 | 0.6  | -0.7 | -1.1 | -1.1 | -1.1 | -0.8 | -0.6 | -0.4 |
| 226 | T | InChI=1S/C5H7N/c1-3-5-6-4-2/h2-3,5-6H,1H3/b5-3+          | 4.2  | 2.8  | -0.6 | -0.4 | -0.3 | -0.3 | -0.5 | -0.6 | -0.7 |
| 227 | T | InChI=1S/C5H7N/c1-4-6-5(2)3/h1,6H,2H2,3H3                | -3.2 | -4.9 | -0.4 | -0.3 | -0.2 | 0.0  | 0.4  | 0.7  | 0.9  |
| 228 | T | InChI=1S/C5H7N/c1-5(2)3-4-6/h1,3H2,2H3                   | -1.8 | -0.3 | -1.8 | -1.8 | -1.6 | -1.3 | -0.8 | -0.5 | -0.3 |
| 229 | T | InChI=1S/C5H7N/c1-5(2)3-4-6/h3H,1-2H3                    | -2.9 | 3.5  | -1.1 | -1.5 | -1.5 | -1.4 | -1.0 | -0.7 | -0.4 |
| 230 | T | InChI=1S/C5H8N/c1-3-5(2)4-6/h3H2,1-2H3                   | -1.3 | 3.7  | -3.9 | -2.4 | -1.7 | -1.3 | -0.8 | -0.6 | -0.3 |
| 231 | T | InChI=1S/C5H8N/c1-3-5-6-4-2/h3-4H,1-2H3                  | 2.8  | 2.8  | -2.2 | -2.1 | -1.8 | -1.5 | -1.0 | -0.7 | -0.2 |
| 232 | T | InChI=1S/C5H8N/c1-4-6-5(2)3/h1,5H,2-3H3                  | -0.6 | 0.1  | 1.0  | 0.4  | 0.1  | -0.1 | -0.3 | -0.3 | -0.3 |
| 233 | T | InChI=1S/C5H8N/c1-4-6-5(2)3/h4H,1-2H2,3H3                | 4.2  | 1.3  | 3.6  | 2.5  | 0.7  | -0.6 | -1.7 | -1.8 | -1.4 |

|     |   |                                                                  |      |      |      |      |      |      |      |      |      |
|-----|---|------------------------------------------------------------------|------|------|------|------|------|------|------|------|------|
| 234 | T | InChI=1S/C5H8N/c1-5(2)3-4-6/h5-6H,1-2H3                          | -1.5 | -3.6 | 0.9  | 0.9  | 1.0  | 1.0  | 1.1  | 1.2  | 1.3  |
| 235 | T | InChI=1S/C5H9N/c1-3-5(2)4-6/h5H,3H2,1-2H3/t5-/m0/s1              | 0.3  | 2.9  | -0.9 | -0.9 | -0.8 | -0.7 | -0.5 | -0.3 | -0.2 |
| 236 | T | InChI=1S/C5H9N/c1-3-5(6)4-2/h3-5H,1-2,6H2                        | -1.3 | 1.7  | 2.4  | 0.9  | -0.2 | -0.8 | -1.0 | -0.8 | -0.4 |
| 237 | T | InChI=1S/C5H9N/c1-3-5-6-4-2/h3,5H,1,4H2,2H3/b6-5-                | -2.5 | -3.1 | 1.6  | 2.5  | 2.9  | 2.8  | 2.3  | 1.8  | 1.1  |
| 238 | T | InChI=1S/C5H9N/c1-3-5-6-4-2/h3-6H,2H2,1H3/b5-3+                  | 1.9  | 0.6  | 1.5  | 1.3  | 1.0  | 1.0  | 1.2  | 1.4  | 1.4  |
| 239 | T | InChI=1S/C5H9N/c1-4-6-5(2)3/h1,5-6H,2-3H3                        | -2.5 | -4.7 | -0.1 | 0.1  | 0.2  | 0.1  | 0.1  | 0.0  | 0.0  |
| 240 | T | InChI=1S/C5H9N/c1-4-6-5(2)3/h4,6H,1-2H2,3H3                      | -3.2 | -5.4 | -2.7 | -2.1 | -1.0 | -0.2 | 0.4  | 0.4  | 0.1  |
| 241 | T | InChI=1S/C5H9N/c1-4-6-5(2)3/h4H,2H2,1,3H3/b6-4-                  | -0.6 | -0.1 | 1.4  | 1.0  | 0.7  | 0.5  | 0.2  | 0.0  | -0.1 |
| 242 | T | InChI=1S/C5H9N/c1-5(2)3-4-6/h3-4,6H,1-2H3/b6-4-                  | -0.3 | 4.5  | -1.2 | -2.7 | -3.3 | -3.3 | -2.8 | -2.1 | -1.1 |
| 243 | T | InChI=1S/C5H9N/c1-5(2,3)4-6/h1-3H3                               | 0.6  | 5.2  | -1.7 | -2.3 | -2.3 | -2.0 | -1.5 | -1.1 | -0.5 |
| 244 | T | InChI=1S/C6H11N/c1-3-5-6(7)4-2/h3-6H,2,7H2,1H3/b5-3-/t6-/m0/s1   | 3.6  | 1.8  | -0.6 | -1.8 | -1.9 | -1.6 | -1.0 | -0.7 | -0.4 |
| 245 | T | InChI=1S/C6H11N/c1-3-6(2)4-5-7/h4-5,7H,3H2,1-2H3/b6-4+,7-5+      | 0.2  | -1.5 | -2.3 | -3.1 | -2.9 | -2.3 | -1.4 | -0.9 | -0.3 |
| 246 | T | InChI=1S/C6H11N/c1-3-6(4-2)5-7/h6H,3-4H2,1-2H3                   | -1.3 | -0.4 | 0.2  | 0.0  | -0.1 | -0.1 | 0.0  | 0.0  | 0.0  |
| 247 | T | InChI=1S/C6H11N/c1-4-6(2,3)5-7/h4H2,1-3H3                        | 0.3  | 4.9  | -3.0 | -3.0 | -2.5 | -2.1 | -1.4 | -1.0 | -0.5 |
| 248 | T | InChI=1S/C6H11N/c1-4-6(5-2)7-3/h4-7H,1-2H2,3H3                   | -2.3 | -3.5 | -1.7 | 0.9  | 2.1  | 2.4  | 2.0  | 1.5  | 0.8  |
| 249 | T | InChI=1S/C6H11N/c1-5(2)7-6(3)4/h7H,1,3H2,2,4H3                   | 6.0  | 3.1  | -1.9 | -2.3 | -2.7 | -3.0 | -3.8 | -4.1 | -3.8 |
| 250 | T | InChI=1S/C6H11N/c1-6(2)4-5-7-3/h4-5H,1-3H3/b7-5-                 | -1.2 | 2.9  | 0.6  | -1.2 | -2.0 | -2.3 | -2.0 | -1.6 | -0.9 |
| 251 | T | InChI=1S/C6H11NO2/c1-3-5-6(4-2)9-7-8/h3,6H,1,4-5H2,2H3/t6-/m0/s1 | -2.0 | -2.8 | 6.6  | 7.6  | 8.3  | 8.7  | 8.7  | 8.3  | 7.0  |
| 252 | T | InChI=1S/C6H13N/c1-5-6(2,3)7-4/h5,7H,1H2,2-4H3                   | 3.6  | -2.8 | 1.6  | 1.6  | 1.4  | 1.2  | 0.8  | 0.5  | 0.1  |
| 253 | T | InChI=1S/C6H13N/c1-5-7(4)6(2)3/h5-6H,1H2,2-4H3                   | 3.6  | -6.4 | 0.1  | 1.0  | 1.0  | 0.5  | -0.2 | -0.6 | -0.5 |
| 254 | T | InChI=1S/C6H13NO/c1-4-5-6(8)7(2)3/h4-5H2,1-3H3                   | 1.3  | -5.8 | -0.9 | -0.3 | 0.1  | 0.3  | 0.5  | 0.6  | 0.7  |
| 255 | T | InChI=1S/C6H13NO/c1-4-7(5-2)6(3)8/h4-5H2,1-3H3                   | 0.2  | -5.6 | 3.1  | 4.0  | 4.2  | 4.0  | 3.0  | 2.1  | 0.7  |
| 256 | T | InChI=1S/C6H15N/c1-3-5-7-6-4-2/h7H,3-6H2,1-2H3                   | 0.0  | 0.8  | -3.4 | -3.2 | -2.8 | -2.4 | -1.7 | -1.1 | -0.4 |
| 257 | T | InChI=1S/C6H15N/c1-4-7(5-2)6-3/h4-6H2,1-3H3                      | 0.6  | -1.0 | 0.5  | 0.2  | 0.2  | 0.2  | 0.2  | 0.2  | 0.2  |
| 258 | T | InChI=1S/C6H15N/c1-5(2)7-6(3)4/h5-7H,1-4H3                       | 2.7  | 3.2  | -1.3 | -0.9 | 0.0  | 0.8  | 1.6  | 1.6  | 0.7  |
| 259 | T | InChI=1S/C6H6N/c1-3-5-7-6-4-2/h1-2H3                             | -0.3 | 5.9  | 1.8  | 1.6  | 1.6  | 1.7  | 1.8  | 1.9  | 2.1  |
| 260 | T | InChI=1S/C6H7N/c1-6(2)4-3-5-7/h6H,1-2H3                          | -0.9 | 0.0  | 0.2  | 0.1  | -0.1 | -0.1 | -0.2 | -0.2 | -0.1 |
| 261 | T | InChI=1S/C6H8N/c1-3-4-6(2)5-7/h3H,1,4H2,2H3                      | 1.4  | -6.1 | 4.7  | 3.2  | 2.3  | 1.7  | 1.0  | 0.6  | 0.1  |
| 262 | T | InChI=1S/C6H8N/c1-6(2)4-3-5-7/h3-4H,1-2H3                        | -3.5 | 3.3  | -4.1 | -4.3 | -3.8 | -3.2 | -2.2 | -1.5 | -0.8 |
| 263 | T | InChI=1S/C6H9N/c1-3-6(2)4-5-7/h4H,3H2,1-2H3/b6-4+                | -2.7 | -2.7 | -0.9 | -0.5 | -0.2 | -0.1 | 0.0  | 0.0  | -0.1 |
| 264 | T | InChI=1S/C7H11N/c1-3-5-7(4-2)6-8/h3,7H,1,4-5H2,2H3/t7-/m1/s1     | -1.0 | -6.8 | 2.1  | 2.2  | 2.0  | 1.8  | 1.3  | 0.9  | 0.4  |
| 265 | T | InChI=1S/C7H11N/c1-4-5-7(2,3)6-8/h4H,1,5H2,2-3H3                 | -1.0 | -7.0 | 5.2  | 4.0  | 3.5  | 3.1  | 2.4  | 1.8  | 0.8  |

|     |   |                                                                   |      |      |      |      |      |      |      |      |      |
|-----|---|-------------------------------------------------------------------|------|------|------|------|------|------|------|------|------|
| 266 | T | InChI=1S/C7H13N/c1-4-5-7(2,3)6-8/h4-5H2,1-3H3                     | 0.1  | -3.1 | -0.5 | 1.2  | 1.3  | 1.0  | 0.5  | 0.3  | 0.2  |
| 267 | T | InChI=1S/C7H14N/c1-4-7(3)6-8-5-2/h6H,4-5H2,1-3H3                  | -3.4 | -5.3 | -0.6 | -0.4 | -0.2 | 0.0  | 0.2  | 0.2  | 0.2  |
| 268 | T | InChI=1S/C7H17N/c1-4-5-8-6-7(2)3/h7-8H,4-6H2,1-3H3                | 0.9  | 4.0  | -0.8 | -0.6 | -0.4 | -0.1 | 0.2  | 0.3  | -0.3 |
| 269 | T | InChI=1S/C8H19N/c1-3-5-7-9-8-6-4-2/h9H,3-8H2,1-2H3                | 1.4  | 7.3  | -1.9 | -2.4 | -2.4 | -2.2 | -1.7 | -1.1 | -0.5 |
| 270 | T | InChI=1S/CH2N/c1-2/h1-2H                                          | -2.4 | -4.3 | 2.1  | 2.3  | 2.1  | 1.9  | 1.5  | 1.2  | 0.8  |
| 271 | T | InChI=1S/CH2N/c1-2/h1H2                                           | -5.2 | -6.3 | 0.4  | -0.1 | -0.1 | 0.0  | 0.4  | 0.6  | 0.6  |
| 272 | T | InChI=1S/CH3N/c1-2/h2H,1H2                                        | 1.7  | 0.4  | -0.6 | -1.2 | -1.3 | -1.2 | -0.7 | -0.4 | -0.2 |
| 273 | T | InChI=1S/CH3NO/c1-2-3/h1H3                                        | 0.0  | 0.0  | 0.0  | 0.0  | 0.0  | 0.0  | 0.0  | 0.0  | 0.0  |
| 274 | T | InChI=1S/CH3NO2/c1-2(3)4/h1H3                                     | 0.0  | 0.0  | 0.0  | 0.0  | 0.0  | 0.0  | 0.0  | 0.0  | 0.0  |
| 275 | T | InChI=1S/CH3NO2/c1-4-2-3/h1H3                                     | 0.0  | 0.0  | 0.0  | 0.0  | 0.0  | 0.0  | 0.0  | 0.0  | 0.0  |
| 276 | T | InChI=1S/CH4N/c1-2/h1-2H2                                         | 2.8  | -5.8 | 2.6  | 2.6  | 2.7  | 2.7  | 2.4  | 2.0  | 1.2  |
| 277 | T | InChI=1S/CH4N/c1-2/h2H,1H3                                        | -2.5 | -3.2 | 3.8  | 2.9  | 2.2  | 1.8  | 1.3  | 1.1  | 0.8  |
| 278 | T | InChI=1S/CH4NO/c1-2-3/h2H,1H3                                     | 1.8  | -4.2 | 3.5  | 3.5  | 3.0  | 2.4  | 1.6  | 1.2  | 0.7  |
| 279 | T | InChI=1S/CH4NO/c1-2-3/h3H,1H3                                     | -1.5 | -1.5 | 1.0  | 0.8  | 0.8  | 0.8  | 0.8  | 0.7  | 0.5  |
| 280 | T | InChI=1S/CH5N/c1-2/h2H2,1H3                                       | -0.5 | -1.7 | 3.4  | 2.0  | 1.1  | 0.7  | 0.3  | 0.2  | 0.2  |
| 281 | T | InChI=1S/CH6N2/c1-3-2/h3H,2H2,1H3                                 | 0.8  | -0.3 | 0.3  | 0.1  | -0.2 | -0.4 | -0.5 | -0.5 | -0.1 |
| 282 | V | InChI=1S/C3H8N2/c1-2-3(4)5/h2H,4-5H2,1H3                          | -1.6 | -1.9 | 4.5  | 3.8  | 2.1  | 0.6  | -0.9 | -0.9 | 0.1  |
| 283 | V | InChI=1S/C4H10N/c1-2-3-4-5/h5H,2-4H2,1H3                          | 2.5  | 0.3  | -2.0 | -1.1 | -0.6 | -0.4 | -0.3 | -0.2 | -0.2 |
| 284 | V | InChI=1S/C4H10N2/c1-2-3-6-4-5/h2,6H,1,3-5H2                       | -0.1 | -0.7 | -0.2 | 0.1  | 0.3  | 0.4  | 0.3  | 0.2  | 0.0  |
| 285 | V | InChI=1S/C4H10NO/c1-3-5(6)4-2/h3-4H2,1-2H3                        | -1.5 | 1.7  | -4.0 | -3.6 | -2.9 | -2.3 | -1.4 | -1.0 | -0.5 |
| 286 | V | InChI=1S/C4H8N/c1-3-4(2)5/h5H,2-3H2,1H3                           | 1.6  | -2.5 | -0.6 | -0.5 | -0.4 | -0.4 | -0.4 | -0.4 | -0.2 |
| 287 | V | InChI=1S/C5H10N/c1-5(2)4-6-3/h4-5H,3H2,1-2H3                      | 1.6  | 2.3  | 0.2  | -0.2 | -0.3 | -0.4 | -0.3 | -0.3 | -0.5 |
| 288 | V | InChI=1S/C5H11N/c1-3-4-5(2)6/h4H,3,6H2,1-2H3/b5-4-                | 0.5  | -2.6 | -3.6 | -2.4 | -1.2 | -0.4 | 0.3  | 0.3  | 0.1  |
| 289 | V | InChI=1S/C5H11N/c1-3-5-6-4-2/h5H,3-4H2,1-2H3/b6-5-                | 1.9  | -1.8 | -0.6 | -0.1 | 0.0  | 0.1  | 0.0  | -0.1 | -0.1 |
| 290 | V | InChI=1S/C5H11NO2/c1-3-5(4-2)8-6-7/h5H,3-4H2,1-2H3                | -0.9 | -3.0 | -1.9 | -1.7 | -1.3 | -1.1 | -1.2 | -1.5 | -1.7 |
| 291 | V | InChI=1S/C5H12N2/c1-3-4-5(6)7-2/h3-5,7H,6H2,1-2H3/b4-3+/t5-/m1/s1 | -2.1 | -2.1 | -0.4 | 0.8  | 2.1  | 3.0  | 3.4  | 2.9  | 1.5  |
| 292 | V | InChI=1S/C5H12N2/c1-3-4-5-7-6-2/h3-5H2,1-2H3                      | 0.2  | -2.5 | -0.8 | 0.2  | 0.6  | 0.6  | 0.5  | 0.4  | 0.2  |
| 293 | V | InChI=1S/C5H8N/c1-5(2)3-4-6/h3,5H,1-2H3                           | 1.0  | -0.2 | -0.1 | -0.5 | -0.6 | -0.6 | -0.6 | -0.7 | -0.6 |
| 294 | V | InChI=1S/C6H11N/c1-4-5-7-6(2)3/h5H,2,4H2,1,3H3/b7-5+              | -1.3 | 0.7  | 0.1  | -0.2 | -0.4 | -0.4 | -0.4 | -0.2 | -0.1 |
| 295 | V | InChI=1S/C6H13N/c1-4-5-6(2,3)7/h4-5H,7H2,1-3H3/b5-4+              | -2.2 | 2.5  | -1.1 | -1.0 | -0.9 | -0.8 | -0.5 | -0.3 | -0.1 |
| 296 | V | InChI=1S/C6H13NO/c1-4-6(8)7(3)5-2/h4-5H2,1-3H3                    | -0.1 | 3.1  | -2.4 | -1.1 | -0.4 | 0.1  | 0.6  | 0.7  | 0.7  |
| 297 | V | InChI=1S/C6H13NO2/c1-4-6(2,3)5-7(8)9/h4-5H2,1-3H3                 | 2.7  | -3.1 | 6.6  | 5.2  | 3.9  | 2.9  | 1.5  | 0.7  | -0.5 |

|            |   |                                                |      |      |     |     |     |     |     |     |      |
|------------|---|------------------------------------------------|------|------|-----|-----|-----|-----|-----|-----|------|
| <b>298</b> | V | InChI=1S/C6H14N/c1-4-6(2,3)5-7/h5H,4,7H2,1-3H3 | -2.6 | 2.3  | 2.6 | 3.1 | 2.6 | 1.9 | 0.8 | 0.2 | -0.2 |
| <b>299</b> | V | InChI=1S/C6H15N/c1-4-6(2,3)5-7/h4-5,7H2,1-3H3  | 2.3  | 2.6  | 1.8 | 1.6 | 1.3 | 0.9 | 0.4 | 0.0 | -0.3 |
| <b>300</b> | V | InChI=1S/C6H8N2/c7-5-3-1-2-4-6-8/h1-4H2        | 1.1  | -0.3 | 1.8 | 1.6 | 1.2 | 0.8 | 0.5 | 0.3 | 0.2  |



## 4. Comparison with previously derived GAVs

Table S4: Differences between group additive values for the standard enthalpy of formation [kJ mol<sup>-1</sup>], the standard entropy and heat capacity [J mol<sup>-1</sup> K<sup>-1</sup>] at different temperatures for nitrogen-containing compounds obtained in this work and reported by Benson et al. [4] for all groups in common.

| Group                                    | GAV (current work) – GAV(literature) |           |             |       |       |       |       |        |        |
|------------------------------------------|--------------------------------------|-----------|-------------|-------|-------|-------|-------|--------|--------|
|                                          | $\Delta_f H^\circ$                   | $S^\circ$ | $C_p^\circ$ |       |       |       |       |        |        |
|                                          | 298 K                                | 298 K     | 300 K       | 400 K | 500 K | 600 K | 800 K | 1000 K | 1500 K |
| C-(C)(N)(H) <sub>2</sub>                 | -0.2                                 | -3.6      | 3.7         | 2.5   | 1.7   | 1.3   | 0.8   | 0.6    |        |
| C-(C)(CN)(H) <sub>2</sub>                | 3.9                                  | -2.2      | 2.6         | 2.1   | 0.8   | -0.2  | -1.1  | -0.7   |        |
| C-(C)(N <sub>A</sub> )(H) <sub>2</sub>   | -3.9                                 | 1.3       | -           | -     | -     | -     | -     | -      | -      |
| C-(N) <sub>2</sub> (H) <sub>2</sub>      | 3.7                                  | -         | -           | -     | -     | -     | -     | -      | -      |
| C-(C) <sub>2</sub> (N)(H)                | 3.1                                  | -3.0      | 5.5         | 4.2   | 2.7   | 2.6   | 1.5   | 1.2    | -      |
| C-(C) <sub>2</sub> (CN)(H)               | 4.0                                  | -8.0      | 2.7         | 3.9   | 4.4   | 3.9   | 2.9   | 2.2    | -      |
| C-(C) <sub>3</sub> (N)                   | 1.3                                  | -0.5      | 5.5         | 4.4   | 3.0   | 2.2   | 0.6   | 0.4    | -      |
| C <sub>d</sub> -(CN)(H)                  | -7.2                                 | 4.8       | 0.0         | -0.8  | -1.3  | -1.2  | -1.0  | 0.3    | -      |
| C <sub>t</sub> -(CN)                     | -21.3                                | -3.0      | -1.0        | -0.8  | -1.0  | -0.9  | -0.7  | -0.6   | -0.6   |
| CO-(C)(N)                                | 15.8                                 | -10.6     | -1.9        | 0.3   | 1.0   | 2.1   | -1.3  | -5.1   |        |
| C-(C)(NO)(H) <sub>2</sub>                | 8.8                                  | -         | -           | -     | -     | -     | -     | -      | -      |
| C-(C) <sub>2</sub> (NO)(H)               | 4.1                                  | -         | -           | -     | -     | -     | -     | -      | -      |
| C-(C)(NO <sub>2</sub> )(H) <sub>2</sub>  | -2.1                                 | 0.4       | -           | -     | -     | -     | -     | -      | -      |
| C-(C) <sub>2</sub> (NO <sub>2</sub> )(H) | 5.8                                  | -1.8      | -           | -     | -     | -     | -     | -      | -      |
| N-(CO)(H) <sub>2</sub>                   | -10.0                                | 19.6      | 11.2        | 6.9   | 3.6   | 1.4   | -0.7  | -1.6   | -      |
| N-(C)(CO)(H)                             | -9.7                                 | -         | -           | -     | -     | -     | -     | -      | -      |
| N-(C)(H) <sub>2</sub>                    | 1.1                                  | 0.8       | -2.8        | -1.6  | -0.8  | -0.3  | -0.1  | 0.0    | 0.1    |
| N-(C) <sub>2</sub> (H)                   | 5.6                                  | -1.5      | 2.7         | 1.3   | 0.6   | 0.3   | 0.0   | -0.3   | 0.0    |
| N-(C) <sub>3</sub>                       | 0.0                                  | 1.6       | 0.7         | 0.6   | 0.7   | 1.1   | 1.5   | 1.9    | 2.4    |
| N-(N)(H) <sub>2</sub>                    | -1.4                                 | 1.4       | 0.7         | 0.3   | -0.3  | -0.8  | -1.5  | -2.0   | -2.5   |
| N-(C)(N)(H)                              | 4.1                                  | -8.4      | 1.1         | 0.8   | 1.1   | 1.5   | 1.9   | 2.4    | 3.4    |
| N-(C) <sub>2</sub> (N)                   | 1.2                                  | 0.2       | -           | -     | -     | -     | -     | -      | -      |
| N <sub>t</sub> -(C)                      | 7.9                                  | -         | -           | -     | -     | -     | -     | -      | -      |
| N <sub>A</sub> -(C)                      | -14.1                                | -         | -           | -     | -     | -     | -     | -      | -      |

**Table S5: Differences between group additive values and pairs of linear dependent for the standard enthalpy of formation [kJ mol<sup>-1</sup>] for nitrogen-containing compounds obtained in this work and reported by Holmes and Aubry [5] for all groups in common.**

| Group                                   | GAV (current work) –<br>GAV (literature) | Pairs of linear dependent<br>groups                           | GAVs (current work) –<br>GAVs (literature) |
|-----------------------------------------|------------------------------------------|---------------------------------------------------------------|--------------------------------------------|
|                                         | $\Delta_f H^\circ$                       |                                                               | $\Delta_f H^\circ$                         |
| C-(C)(N)(H) <sub>2</sub>                | -4.8                                     | C-(CN)(C)(H) <sub>2</sub> +CN-(C)                             | 4.1                                        |
| C-(C)(CN)(H) <sub>2</sub>               | 124.1                                    | C-(CN)(C <sub>d</sub> )(H) <sub>2</sub> +CN-(C <sub>d</sub> ) | 9.1                                        |
| C-(C <sub>d</sub> )(CN)(H) <sub>2</sub> | 124.1                                    | N-(CO)(H) <sub>2</sub> +CO-(N)(C)                             | 2.1                                        |
| C-(C) <sub>2</sub> (N)(H)               | -0.6                                     | N-(C)(CO)(H)+CO-(N)(C)                                        | 6.4                                        |
| C-(C) <sub>3</sub> (N)                  | 0.9                                      |                                                               |                                            |
| C <sub>d</sub> -(C)(N)                  | 0.4                                      |                                                               |                                            |
| C <sub>1</sub> -(C)(H)                  | 26                                       |                                                               |                                            |
| C <sub>1</sub> -(C <sub>d</sub> )(H)    | 3.0                                      |                                                               |                                            |
| C <sub>1</sub> -(C) <sub>2</sub>        | 3.5                                      |                                                               |                                            |
| N-(CO)(H) <sub>2</sub>                  | 39                                       |                                                               |                                            |
| N-(C)(CO)(H)                            | -8.1                                     |                                                               |                                            |
| N-(C) <sub>2</sub> (CO)                 | 1.0                                      |                                                               |                                            |
| N-(C)(H) <sub>2</sub>                   | 3.1                                      |                                                               |                                            |
| N-(C) <sub>2</sub> (H)                  | 5.0                                      |                                                               |                                            |
| N-(C) <sub>3</sub>                      | 0.0                                      |                                                               |                                            |
| N-(C)(C <sub>d</sub> )(H)               | -3.2                                     |                                                               |                                            |
| N-(C <sub>d</sub> ) <sub>2</sub> (H)    | -1.6                                     |                                                               |                                            |
| N <sub>1</sub> -(H)                     | -2.3                                     |                                                               |                                            |
| N <sub>1</sub> -(C)                     | 1.0                                      |                                                               |                                            |
| N <sub>1</sub> -(C <sub>d</sub> )       | -12.9                                    |                                                               |                                            |

**Table S6: Differences between group additive values and pairs of linear dependent groups for the standard enthalpy of formation [kJ mol<sup>-1</sup>], the standard entropy and heat capacity [J mol<sup>-1</sup> K<sup>-1</sup>] at different temperatures for nitrogen-containing compounds obtained in this work and reported by Ashcraft et al. [6] for all groups in common.**

| Group                                                           | GAV (current work) – GAV(literature) |           |             |       |       |       |       |        |        |
|-----------------------------------------------------------------|--------------------------------------|-----------|-------------|-------|-------|-------|-------|--------|--------|
|                                                                 | $\Delta_f H^\circ$                   | $S^\circ$ | $C_p^\circ$ |       |       |       |       |        |        |
|                                                                 | 298 K                                | 298 K     | 300 K       | 400 K | 500 K | 600 K | 800 K | 1000 K | 1500 K |
| C-(C)(N)(H) <sub>2</sub>                                        | -0.2                                 | -3.6      | 3.5         | 2.5   | 1.6   | 1.2   | 0.7   | 0.7    | -1.9   |
| C-(C)(C <sub>1</sub> )(H) <sub>2</sub>                          | 1.6                                  | 0.1       | 0.5         | 0.3   | 0.3   | 0.1   | -0.2  | -0.4   | -0.1   |
| C-(C)(CN)(H) <sub>2</sub>                                       | 2.3                                  | -0.5      | 1.7         | 1.7   | 1.6   | 1.4   | 1.0   | 1.0    | 1.1    |
| C-(C)(N <sub>A</sub> )(H) <sub>2</sub>                          | -3.9                                 | 3.0       | 0.2         | -0.1  | -0.5  | -0.5  | -0.7  | -0.5   | -0.3   |
| C-(C) <sub>2</sub> (C <sub>1</sub> )(H)                         | 1.8                                  | 0.2       | 0.6         | 0.2   | 0.2   | 0.5   | 0.1   | 0.5    | 0.6    |
| C-(C) <sub>3</sub> (CN)                                         | 4.2                                  | -6.0      | 2.8         | 3.3   | 3.6   | 3.9   | 3.2   | 3.3    | 3.2    |
| C <sub>d</sub> -(C)(N)                                          | 26.7                                 | 0.9       | -1.7        | -3.5  | -3.9  | -3.8  | -3.3  | -2.3   | -      |
| C <sub>d</sub> -(C)(CN)                                         | -2.7                                 | -3.1      | 3.1         | 2.9   | 2.6   | 2.7   | 2.2   | 1.8    | 1.3    |
| C <sub>1</sub> -(C)(H)                                          | 10.1                                 | -6.2      | -5.6        | -5.5  | -5.7  | -6.1  | -6.3  | -7.2   | -      |
| C <sub>1</sub> -(C) <sub>2</sub>                                | 1.6                                  | -54.9     | -1.5        | -1.8  | -2.6  | -3.2  | -4.4  | -5.0   | -6.0   |
| C-(C)(NO)(H) <sub>2</sub>                                       | -0.9                                 | -1.4      | -1.0        | -0.9  | -0.4  | -0.4  | 0.1   | 0.3    | 0.2    |
| C-(C) <sub>2</sub> (NO)(H)                                      | -0.9                                 | -7.2      | 5.2         | 4.5   | 3.9   | 3.4   | 2.5   | 2.3    | 1.9    |
| C-(C)(NO <sub>2</sub> )(H) <sub>2</sub>                         | -3.4                                 | -1.7      | 3.0         | 2.2   | 1.7   | 1.5   | 1.1   | 0.7    | 0.2    |
| C-(C) <sub>2</sub> (NO <sub>2</sub> )(H)                        | -2.2                                 | -4.3      | 0.6         | 0.9   | 1.4   | 1.9   | 2.1   | 2.1    | 1.8    |
| N-(C <sub>d</sub> )(H) <sub>2</sub>                             | -27.0                                | -0.6      | 2.0         | 2.4   | 2.0   | 1.8   | 1.7   | 1.4    | 1.2    |
| N-(C)(C <sub>d</sub> )(H)                                       | -26.2                                | 0.0       | -2.7        | -1.8  | -0.9  | 0.5   | 1.7   | 2.5    | 2.8    |
| N-(N)(H) <sub>2</sub>                                           | -1.4                                 | 1.5       | 0.7         | 0.2   | -0.2  | -0.9  | -1.4  | -1.9   | -2.5   |
| N-(C)(N)(H)                                                     | 4.1                                  | -8.3      | 1.2         | 0.8   | 1.1   | 1.5   | 1.9   | 2.4    | 3.4    |
| N-(C) <sub>2</sub> (N)                                          | 11.2                                 | 3.1       | -0.2        | -1.5  | -2.0  | -1.7  | -0.7  | 0.6    | 1.7    |
| N <sub>1</sub> -(H)                                             | -6.5                                 | 55.1      | 5.2         | 5.0   | 5.4   | 5.9   | 6.6   | 7.2    | 8.0    |
| N <sub>1</sub> -(C)                                             | 7.9                                  | 56.7      | 6.6         | 5.7   | 6.4   | 7.0   | 8.3   | 8.7    | 9.7    |
| N <sub>A</sub> -(C)                                             | 8.9                                  | -1.7      | -0.1        | 0.1   | 0.8   | 1.1   | 1.2   | 1.0    | 1.1    |
| <b>Pairs of linear dependent GAVs</b>                           |                                      |           |             |       |       |       |       |        |        |
| N-(C <sub>d</sub> )(H) <sub>2</sub><br>+ C <sub>d</sub> -(C)(N) | -0.3                                 | -0.6      | 2.0         | 2.4   | 2.0   | 1.8   | 1.7   | 1.4    | 1.2    |
| N-(C <sub>d</sub> )(C)(H)<br>+ C <sub>d</sub> -(C)(N)           | 0.5                                  | 0.0       | -2.7        | -1.8  | -0.9  | 0.5   | 1.7   | 2.5    | 2.8    |

## References

- [1] B. Ruscic, D.H. Bross, Active Thermochemical Tables (ATcT) values based on ver. 1.122d of the Thermochemical Network (2018); available at ATcT.anl.gov, 2018.
- [2] J. Pedley, R.D. Naylor, S.P. Kirby, Thermochemical data of organic compounds, Springer Netherlands, 1986.
- [3] P.J. Lindstrom, W.G. Mallard, NIST Chemistry WebBook, NIST Standard Reference Database Number 69, National Institute of Standards and Technology, Gaithersburg MD.
- [4] S.W. Benson, F.R. Cruickshank, D.M. Golden, G.R. Haugen, H.E. O'Neal, A.S. Rodgers, R. Shaw, R. Walsh, Additivity rules for the estimation of thermochemical properties, Chemical Reviews 69 (1969) 279-324.
- [5] J.L. Holmes, C. Aubry, Group Additivity Values for Estimating the Enthalpy of Formation of Organic Compounds: An Update and Reappraisal. 2. C, H, N, O, S, and Halogens, The Journal of Physical Chemistry A 116 (2012) 7196-7209.
- [6] R.W. Ashcraft, W.H. Green, Thermochemical Properties and Group Values for Nitrogen-Containing Molecules, The Journal of Physical Chemistry A 112 (2008) 9144-9152.
